# Supplementary material for: Fecal Microbial and Metabolic Profiles in Dogs With Acute Diarrhea Receiving Either Fecal Microbiota Transplantation or Oral Metronidazole
Source: Front Vet Sci. 2020 Apr 16;7:192. doi: 10.3389/fvets.2020.00192 (PMC7182012; doi:10.3389/fvets.2020.00192)
Supplement: Supplementary file 2 [file Table_2.XLSX]

## Sheet: FMT group
S2 Table. Untargeted fecal metabolomics in dogs with acute diarrhea (pre_FMT), and 1 week and 4 weeks post FMT, and compared to healthy control dogs (HC). Columns not sharing a common superscript are significantly different from each other (p<0.05) within groups
Metabolome		Acute_Pre_FMT			Acute_FMT_1W			Acute_FMT_4W			Acute_Pre_FMT vs Acute_FMT_1W vs Acute_FMT_4W				Metabolome		HC			Acute_Pre_FMT			Acute_FMT_1W			Acute_FMT_4W			HC vs Acute_Pre_FMT			HC vs Acute_FMT_1W			HC vs Acute_FMT_4W			Acute_Pre_FMT vs _Acute_FMT_1W
		Median	Range		Median	Range		Median	Range		P value	Q value					Median	Range		Median	Range		Median	Range		Median	Range		P value	Q value		P value	Q value		P value	Q value		P value	Q value
zymosterol		702a	112-6797		2513.5a	227-5343		2997.5b	801-5559		0.0063	0.0612931			zymosterol		4096	1852-14724		702a	112-6797		2513.5a	227-5343		2997.5b	801-5559		0.0007	0.00474		0.0192	0.091008		0.1599	0.33836		0.2568	0.382777
xylose		13261.5a	2646-2746895		203174.5b	76941-1325000		170654.5a,b	24733-1725528		0.0179	0.0986581			xylose		506827	34042-2520664		13261.5a	2646-2746895		203174.5b	76941-1325000		170654.5a,b	24733-1725528		0.0034	0.0113493		0.4823	0.642163		0.2416	0.44387		0.0041	0.0962812
xylonic acid isomer		286.5	77-1292		514.5	144-995		552.5	192-1982		0.0665	0.17131			xylonic acid isomer		600.5	264-1343		286.5	77-1292		514.5	144-995		552.5	192-1982		0.0192	0.0392276		0.3798	0.559084		0.7034	0.809251		0.1736	0.309347
xylitol		398a	143-2276		1223b	313-6101		1044a,b	154-3991		0.0259	0.107689			xylitol		942.5	482-3215		398a	143-2276		1223b	313-6101		1044a,b	154-3991		0.0059	0.0170524		0.6819	0.784516		0.8148	0.877762		0.0233	0.120046
xanthurenic acid		415	57-13743		243.5	68-2883		247	103-5831		0.9737	0.977826			xanthurenic acid		400	140-707		415	57-13743		243.5	68-2883		247	103-5831		0.8606	0.898512		0.0895	0.24104		0.1011	0.239607		0.4497	0.566909
xanthine		4024	118-58123		8399	4740-93945		9939.5	2841-56740		0.0781	0.185097			xanthine		15598	2280-34428		4024	118-58123		8399	4740-93945		9939.5	2841-56740		0.0224	0.043161		0.7697	0.844532		1	1		0.0494	0.1482
vanillic acid		181a	52-999		417a,b	229-1524		486.5b	167-1763		0.0259	0.107689			vanillic acid		787.5	417-7759		181a	52-999		417a,b	229-1524		486.5b	167-1763		0.0006	0.00474		0.0071	0.067308		0.0695	0.196089		0.0126	0.119124
valine		588814	204819-1445170		239202	93132-572845		396990	115207-878303		0.3675	0.509342			valine		226796	63811-538041		588814	204819-1445170		239202	93132-572845		396990	115207-878303		0.0059	0.0170524		0.7697	0.844532		0.0695	0.196089		0.0284	0.124644
uridine		1548.5a	283-4113		1968a,b	1299-4652		3103b	1194-11190		0.0456	0.146043			uridine		2374.5	1458-5214		1548.5a	283-4113		1968a,b	1299-4652		3103b	1194-11190		0.0895	0.133406		0.2416	0.433782		0.4823	0.645792		0.1988	0.3318
uric acid		2797	491-45769		1032.5	172-12211		1034	273-13209		0.1873	0.319353			uric acid		4225.5	234-36869		2797	491-45769		1032.5	172-12211		1034	273-13209		0.5195	0.597677		0.0404	0.154432		0.0084	0.079632		0.1736	0.309347
urea		6287.5	1066-271112		6291.5	3829-12177		5772	4047-13123		0.6013	0.716121			urea		9298.5	1745-15977		6287.5	1066-271112		6291.5	3829-12177		5772	4047-13123		0.5582	0.632983		0.4124	0.588788		0.5582	0.699965		0.7624	0.795986
uracil		27856a	4882-159447		28868.5a,b	4586-207002		50416.5b	16717-165191		0.0259	0.107689			uracil		90910.5	48798-349708		27856a	4882-159447		28868.5a,b	4586-207002		50416.5b	16717-165191		0.0041	0.0127855		0.0084	0.0737333		0.0895	0.23056		0.5967	0.693225
UDP-glucuronic acid		1814a	498-7385		3675a,b	739-6801		4007.5b	1112-15458		0.0456	0.146043			UDP-glucuronic acid		5053.5	2771-13651		1814a	498-7385		3675a,b	739-6801		4007.5b	1112-15458		0.0071	0.0184912		0.0465	0.172195		0.2918	0.473838		0.2899	0.413893
tyrosine		229853.5a,b	42113-611175		102124.5a	68500-442919		249204b	81475-704568		0.0456	0.146043			tyrosine		130543	50955-297691		229853.5a,b	42113-611175		102124.5a	68500-442919		249204b	81475-704568		0.1432	0.204448		0.7253	0.810831		0.0695	0.196089		0.2568	0.382777
tyramine		123927	15278-450785		129734	16909-682250		149470	44253-638273		0.8302	0.890305			tyramine		83806.5	15057-214868		123927	15278-450785		129734	16909-682250		149470	44253-638273		0.1781	0.239828		0.3488	0.533326		0.061	0.187753		0.7624	0.795986
tryptophan		73232.5	29599-167455		105130	41107-161752		141720	44729-255035		0.1873	0.319353			tryptophan		106570	29855-414417		73232.5	29599-167455		105130	41107-161752		141720	44729-255035		0.2188	0.286495		0.5582	0.699965		0.9068	0.946747		0.4963	0.603195
trehalose		1576.5	222-10842		4078.5	764-14398		2809.5	599-37237		0.4362	0.571157			trehalose		3210	851-31359		1576.5	222-10842		4078.5	764-14398		2809.5	599-37237		0.1139	0.167666		0.9533	0.961413		0.5582	0.699965		0.1988	0.3318
trans-4-hydroxyproline		10014	2191-55899		9065	3197-50041		9641.5	3657-47043		0.7103	0.801624			trans-4-hydroxyproline		7545	1622-21418		10014	2191-55899		9065	3197-50041		9641.5	3657-47043		0.6819	0.751676		0.3195	0.511632		0.3798	0.5697		0.8798	0.894904
tranexamic acid NIST		663	400-6487		1437.5	375-22497		1671	563-18026		0.7103	0.801624			tranexamic acid NIST		1725	536-15509		663	400-6487		1437.5	375-22497		1671	563-18026		0.0465	0.07347		0.5582	0.699965		1	1		0.1988	0.3318
tocopherol gamma-		712a	99-16854		4732.5a,b	756-33220		7828.5b	1968-23897		0.0115	0.0757083			tocopherol gamma-		5502.5	1513-24937		712a	99-16854		4732.5a,b	756-33220		7828.5b	1968-23897		0.0034	0.0113493		0.5582	0.699965		0.4823	0.645792		0.0102	0.119124
tocopherol delta- NIST		1378a	206-7482		2844.5b	1109-20954		4595.5a,b	590-10724		0.0259	0.107689			tocopherol delta- NIST		4147	1429-16003		1378a	206-7482		2844.5b	1109-20954		4595.5a,b	590-10724		0.0224	0.043161		0.4124	0.588788		1	1		0.0494	0.1482
tocopherol alpha-		927a	92-27578		8305a,b	2186-19303		17105.5b	871-61457		0.0179	0.0986581			tocopherol alpha-		56574	6573-253750		927a	92-27578		8305a,b	2186-19303		17105.5b	871-61457		0.0001	0.0029625		0.0002	0.0158		0.0118	0.0847455		0.0156	0.119124
tocopherol acetate		120.5a	31-297		392b	130-2465		401.5b	165-3178		0.0063	0.0612931			tocopherol acetate		6726	1349-34078		120.5a	31-297		392b	130-2465		401.5b	165-3178		0.0001	0.0029625		0.0001	0.0158		0.0002	0.0474		0.004	0.0962812
thymine		9606a	3905-31276		14409.5a,b	1872-42709		20700.5b	6930-34841		0.002	0.0526667			thymine		26775	13315-55561		9606a	3905-31276		14409.5a,b	1872-42709		20700.5b	6930-34841		0.0003	0.00374211		0.0224	0.100166		0.1599	0.33836		0.1306	0.264549
thymidine		3964a	345-8605		6931.5a,b	2451-20717		10467b	5033-21108		0.0034	0.05372			thymidine		7452	950-26067		3964a	345-8605		6931.5a,b	2451-20717		10467b	5033-21108		0.0303	0.0528022		0.7253	0.810831		0.2416	0.44387		0.0696	0.177368
threonine		27985.5	10701-90258		11754	6279-37122		24249	4814-60452		0.2223	0.35598			threonine		8348	3004-29738		27985.5	10701-90258		11754	6279-37122		24249	4814-60452		0.0028	0.0103687		0.1139	0.275452		0.0164	0.0948		0.0588	0.162042
threonic acid		243a	80-704		434a,b	211-6562		721.5b	224-2092		0.0456	0.146043			threonic acid		872.5	292-2691		243a	80-704		434a,b	211-6562		721.5b	224-2092		0.0002	0.0029625		0.1011	0.260442		0.2919	0.473838		0.0233	0.120046
tagatose		4027.5	51-88236		5628.5	1762-26950		9919.5	4574-15946		0.2223	0.35598			tagatose		3837.5	339-53988		4027.5	51-88236		5628.5	1762-26950		9919.5	4574-15946		0.5582	0.632983		0.3488	0.533326		0.0224	0.106176		0.2899	0.413893
sucrose		5040	1398-37567		5687.5	1772-15221		16552	2367-51193		0.0665	0.17131			sucrose		16301	3436-203082		5040	1398-37567		5687.5	1772-15221		16552	2367-51193		0.0261	0.0472191		0.0028	0.0474		0.9533	0.978061		0.8798	0.894904
succinic acid		26597.5	1730-4400217		8445.5	3101-2890880		7811	1434-231766		0.0924	0.21261			succinic acid		4456.5	1346-2053774		26597.5	1730-4400217		8445.5	3101-2890880		7811	1434-231766		0.0192	0.0392276		0.061	0.20362		0.2919	0.473838		0.2265	0.353161
stearic acid		467580	190261-4121008		503290	269597-3954450		524642	343311-809140		0.8302	0.890305			stearic acid		936827	259263-1584324		467580	190261-4121008		503290	269597-3954450		524642	343311-809140		0.2659	0.331675		0.0192	0.091008		0.0034	0.0503625		0.9397	0.943682
spermidine		504	201-3312		1261.5	294-4870		1442	370-6374		0.0665	0.17131			spermidine		3001.5	386-15955		504	201-3312		1261.5	294-4870		1442	370-6374		0.0041	0.0127855		0.2416	0.433782		0.2919	0.473838		0.0211	0.120046
shikimic acid		966.5a	128-6096		3961.5b	1353-11936		4903.5b	1497-11486		0.0013	0.05135			shikimic acid		4400.5	2255-14881		966.5a	128-6096		3961.5b	1353-11936		4903.5b	1497-11486		0.0008	0.00474		0.3488	0.533326		0.6395	0.754037		0.0025	0.0962812
serine		118856	38750-423335		52750	15901-323370		114264	33339-312513		0.3675	0.509342			serine		47479.5	16856-130427		118856	38750-423335		52750	15901-323370		114264	33339-312513		0.0118	0.0271515		0.5195	0.665522		0.0118	0.0847455		0.1509	0.286106
ribose		8710.5a	1150-62232		38329b	5494-128544		29592.5a,b	8615-230706		0.0259	0.107689			ribose		56118	7123-154731		8710.5a	1150-62232		38329b	5494-128544		29592.5a,b	8615-230706		0.0023	0.00879194		0.2919	0.487185		0.3798	0.5697		0.0126	0.119124
ribonic acid		258.5	113-3536		825	216-4652		746	199-8466		0.6013	0.716121			ribonic acid		1091.5	359-3921		258.5	113-3536		825	216-4652		746	199-8466		0.0071	0.0184912		0.6395	0.761616		0.4124	0.592356		0.0413	0.146091
ribitol		2604a	554-6357		4286.5a,b	1745-10437		4835b	1448-27775		0.0259	0.107689			ribitol		2618.5	1457-4016		2604a	554-6357		4286.5a,b	1745-10437		4835b	1448-27775		1	1		0.1011	0.260442		0.061	0.187753		0.1509	0.286106
quinic acid		1545a	380-15075		4317.5a,b	545-20362		8207b	209-121178		0.0115	0.0757083			quinic acid		2807	549-21014		1545a	380-15075		4317.5a,b	545-20362		8207b	209-121178		0.2659	0.331675		0.4823	0.642163		0.0164	0.0948		0.1988	0.3318
pyruvic acid		668.5	303-2123		1311	537-2868		1938	739-4095		0.2223	0.35598			pyruvic acid		1794	749-3670		668.5	303-2123		1311	537-2868		1938	739-4095		0.01	0.024433		0.3195	0.511632		0.5195	0.665522		0.1123	0.239989
pyrrole-2-carboxylic acid		884.5	345-1892		1279	602-2261		1691.5	526-2376		0.1873	0.319353			pyrrole-2-carboxylic acid		2302.5	106-4345		884.5	345-1892		1279	602-2261		1691.5	526-2376		0.0034	0.0113493		0.0139	0.0823575		0.1139	0.257089		0.1509	0.286106
putrescine		16520.5	900-681971		112725	19785-489299		155182	66501-573808		0.0665	0.17131			putrescine		282018	20067-1187680		16520.5	900-681971		112725	19785-489299		155182	66501-573808		0.0059	0.0170524		0.4823	0.642163		0.9068	0.946747		0.0191	0.119124
pseudo uridine		1820.5	128-5830		2249.5	508-14499		3180	1442-6618		0.0924	0.21261			pseudo uridine		4270.5	1259-12918		1820.5	128-5830		2249.5	508-14499		3180	1442-6618		0.0465	0.07347		0.1977	0.384057		0.1011	0.239607		0.4497	0.566909
propyleneglycol		1441.5a	0-1055978		0a	0-31642		4748a	0-164817		0.0265	0.108284			propyleneglycol		5773.5	174-54755		1441.5a	0-1055978		0a	0-31642		4748a	0-164817		0.2405	0.309509		0.0208	0.0966588		0.8148	0.877762		0.2467	0.382143
propane-1,3-diol NIST		3040.5a,b	365-22964		3267a	872-8793		2628.5b	353-7759		0.0456	0.146043			propane-1,3-diol NIST		9051.5	2925-19699		3040.5a,b	365-22964		3267a	872-8793		2628.5b	353-7759		0.0465	0.07347		0.0139	0.0823575		0.0023	0.0503625		0.6501	0.733684
proline		120282a	24286-267759		20006.5b	7882-140680		58500.5a,b	6407-195145		0.0456	0.146043			proline		18473	3440-94532		120282a	24286-267759		20006.5b	7882-140680		58500.5a,b	6407-195145		0.0023	0.00879194		0.4823	0.642163		0.0404	0.162285		0.0233	0.120046
piperidone		1423	205-12231		5430.5	280-33269		3136	946-36328		0.1352	0.273867			piperidone		7284	2181-61321		1423	205-12231		5430.5	280-33269		3136	946-36328		0.0034	0.0113493		0.1977	0.384057		0.1279	0.283293		0.1736	0.309347
pipecolinic acid		441a	35-1297		1324.5b	452-4352		2084.5b	636-5737		0.0004	0.0316			pipecolinic acid		4786.5	1127-14928		441a	35-1297		1324.5b	452-4352		2084.5b	636-5737		0.0001	0.0029625		0.0059	0.0665857		0.0465	0.17775		0.0052	0.0962812
pinitol		187	53-14077		4393.5	119-56586		2527.5	156-28283		0.0781	0.185097			pinitol		443	157-3071		187	53-14077		4393.5	119-56586		2527.5	156-28283		0.4823	0.563079		0.0164	0.0844957		0.1977	0.400469		0.0494	0.1482
phytosphingosine		3657a	712-46866		2808.5a,b	1787-177809		6728.5b	1562-30323		0.0456	0.146043			phytosphingosine		10661	2425-79423		3657a	712-46866		2808.5a,b	1787-177809		6728.5b	1562-30323		0.0261	0.0472191		0.0164	0.0844957		0.6395	0.754037		0.7055	0.770523
p-hydroxylphenyllactic acid		255.5	122-3675		1010.5	244-4691		1483.5	220-13797		0.1352	0.273867			p-hydroxylphenyllactic acid		958.5	468-5128		255.5	122-3675		1010.5	244-4691		1483.5	220-13797		0.0059	0.0170524		0.5195	0.665522		0.6395	0.754037		0.0494	0.1482
phosphate		11374a	3848-69618		5881.5b	2522-16571		6552a,b	2599-13009		0.0259	0.107689			phosphate		11778	2764-28670		11374a	3848-69618		5881.5b	2522-16571		6552a,b	2599-13009		0.9068	0.934398		0.0139	0.0823575		0.01	0.0817241		0.0494	0.1482
phenylethylamine		3169	438-52330		5566.5	1158-32754		5428.5	1475-49232		0.8302	0.890305			phenylethylamine		2422.5	601-15082		3169	438-52330		5566.5	1158-32754		5428.5	1475-49232		0.7697	0.821707		0.1011	0.260442		0.0895	0.23056		0.4057	0.537156
phenylalanine		163524	55556-358935		90458.5	44708-229843		186820	31115-301840		0.9737	0.977826			phenylalanine		68250.5	8098-249100		163524	55556-358935		90458.5	44708-229843		186820	31115-301840		0.0303	0.0528022		0.3798	0.559084		0.0533	0.183074		0.1124	0.239989
phenylacetic acid		2273.5	778-25019		9364.5	646-24069		14381.5	948-32650		0.1352	0.273867			phenylacetic acid		10443.5	2982-133239		2273.5	778-25019		9364.5	646-24069		14381.5	948-32650		0.035	0.0596763		0.4124	0.588788		1	1		0.2899	0.413893
phenol		2210.5	475-11841		3562	846-14251		4457	1724-7313		0.1873	0.319353			phenol		8419.5	3354-14712		2210.5	475-11841		3562	846-14251		4457	1724-7313		0.0059	0.0170524		0.0139	0.0823575		0.0028	0.0503625		0.2265	0.353161
pentose		13856	1961-63520		28190.5	12785-342821		24957.5	3423-80206		0.1873	0.319353			pentose		130984	13339-433108		13856	1961-63520		28190.5	12785-342821		24957.5	3423-80206		0.0008	0.00474		0.0695	0.222588		0.0084	0.079632		0.0343	0.137781
pentitol		107.5	27-1041		571	192-2559		347.5	136-2756		0.0665	0.17131			pentitol		375	181-990		107.5	27-1041		571	192-2559		347.5	136-2756		0.0465	0.07347		0.178	0.360767		0.9533	0.978061		0.0191	0.119124
pentadecanoic acid		7618a	1504-27979		11704a,b	3542-23898		13678b	5537-21724		0.0456	0.146043			pentadecanoic acid		30094	10379-70327		7618a	1504-27979		11704a,b	3542-23898		13678b	5537-21724		0.0002	0.0029625		0.0006	0.0316		0.0013	0.0503625		0.1509	0.286106
pantothenic acid		815.5a	77-3812		2114.5a,b	861-6640		2530.5b	296-5160		0.0034	0.05372			pantothenic acid		4387.5	1376-29783		815.5a	77-3812		2114.5a,b	861-6640		2530.5b	296-5160		0.0006	0.00474		0.0192	0.091008		0.0224	0.106176		0.0126	0.119124
palmitoleic acid		1134	380-8595		1307.5	481-7577		1225	363-7782		0.6013	0.716121			palmitoleic acid		3088.5	739-19260		1134	380-8595		1307.5	481-7577		1225	363-7782		0.0139	0.0310783		0.1011	0.260442		0.0139	0.0915083		0.3643	0.496202
palmitic acid		75545	25036-847961		92603.5	49392-613604		81131	57408-147326		0.8302	0.890305			palmitic acid		191536	53170-400237		75545	25036-847961		92603.5	49392-613604		81131	57408-147326		0.0071	0.0184912		0.01	0.0764516		0.0007	0.0503625		0.4963	0.603195
oxoproline		168738	37651-659772		76423	20388-681796		110430	41896-1340131		0.1352	0.273867			oxoproline		71373.5	34029-203976		168738	37651-659772		76423	20388-681796		110430	41896-1340131		0.01	0.024433		0.8148	0.88177		0.0261	0.121288		0.0696	0.177368
orotic acid		330.5	53-3676		443	177-2183		645.5	212-2268		0.9737	0.977826			orotic acid		381.5	182-1120		330.5	53-3676		443	177-2183		645.5	212-2268		0.7253	0.792148		0.8606	0.910546		0.1599	0.33836		0.6501	0.733684
ornithine		29464	7177-85449		23914.5	8346-155822		28849.5	16401-621511		0.6013	0.716121			ornithine		24639	10864-145504		29464	7177-85449		23914.5	8346-155822		28849.5	16401-621511		0.7697	0.821707		0.5982	0.746176		0.5982	0.727043		0.7055	0.770523
oleic acid		22192.5	895-224671		6206	797-32817		6307.5	835-14939		0.6013	0.716121			oleic acid		11493.5	3374-445856		22192.5	895-224671		6206	797-32817		6307.5	835-14939		0.9533	0.969666		0.2416	0.433782		0.0695	0.196089		0.4497	0.566909
oleamide NIST		1759.5	571-21092		2261	487-6524		4171.5	944-10527		0.0665	0.17131			oleamide NIST		1213	393-2427		1759.5	571-21092		2261	487-6524		4171.5	944-10527		0.4464	0.534327		0.0465	0.172195		0.0034	0.0503625		0.4961	0.603195
octadecylglycerol		7652	2181-105107		8606.5	514-65118		8558.5	3979-30315		0.7103	0.801624			octadecylglycerol		20243	3142-69284		7652	2181-105107		8606.5	514-65118		8558.5	3979-30315		0.2659	0.331675		0.0533	0.185766		0.0533	0.183074		0.5967	0.693225
octadecanol		474	90-1526		967	455-1158		990.5	604-1565		0.0665	0.17131			octadecanol		1584.5	532-3142		474	90-1526		967	455-1158		990.5	604-1565		0.0008	0.00474		0.079	0.225578		0.1139	0.257089		0.0413	0.146091
norvaline		3799	765-26312		8718.5	2875-22739		6558.5	2791-20379		0.3159	0.453747			norvaline		9620.5	1304-37298		3799	765-26312		8718.5	2875-22739		6558.5	2791-20379		0.0261	0.0472191		0.6819	0.784516		0.3488	0.540298		0.0494	0.1482
nonadecanoic acid		1903	679-7658		1808.5	974-6430		1927.5	678-8134		0.9737	0.977826			nonadecanoic acid		2463	1234-4431		1903	679-7658		1808.5	974-6430		1927.5	678-8134		0.2188	0.286495		0.079	0.225578		0.2534	0.461968		1	1
nicotinic acid		7356.5a	1763-15067		11869.5b	906-28060		14520a,b	9089-24292		0.0259	0.107689			nicotinic acid		15899.5	9850-41861		7356.5a	1763-15067		11869.5b	906-28060		14520a,b	9089-24292		0.0002	0.0029625		0.1599	0.341408		0.2188	0.42159		0.2899	0.413893
nicotianamine		127a	66-6844		330.5a,b	111-4762		534.5b	164-13784		0.002	0.0526667			nicotianamine		611	240-3815		127a	66-6844		330.5a,b	111-4762		534.5b	164-13784		0.0118	0.0271515		0.2918	0.487185		0.5982	0.727043		0.0695	0.177368
N-acetylputrescine		4415.5	747-19192		5544.5	1871-44232		5502.5	1900-22263		0.8302	0.890305			N-acetylputrescine		8051.5	2053-28505		4415.5	747-19192		5544.5	1871-44232		5502.5	1900-22263		0.2919	0.358447		0.5195	0.665522		0.5195	0.665522		0.5453	0.652708
N-acetylornithine		1024	46-21383		1661	839-23878		2435.5	637-21079		0.6013	0.716121			N-acetylornithine		3908	1587-16857		1024	46-21383		1661	839-23878		2435.5	637-21079		0.0224	0.043161		0.0895	0.24104		0.079	0.215207		0.1306	0.264549
N-acetyl-D-mannosamine		955.5	183-6819		3420	417-8824		2127	1006-5751		0.9737	0.977826			N-acetyl-D-mannosamine		2053.5	210-7336		955.5	183-6819		3420	417-8824		2127	1006-5751		0.2416	0.309509		0.4124	0.588788		0.6395	0.754037		0.1124	0.239989
n-acetyl-d-hexosamine		935	261-4458		1618.5	611-5041		1028	562-4133		0.0665	0.17131			n-acetyl-d-hexosamine		2939.5	946-7280		935	261-4458		1618.5	611-5041		1028	562-4133		0.0023	0.00879194		0.079	0.225578		0.0224	0.106176		0.0284	0.124644
N-acetyl-D-galactosamine		8283.5	213-18504		9815.5	3130-39453		10529	1535-34625		0.3159	0.453747			N-acetyl-D-galactosamine		12957.5	615-87159		8283.5	213-18504		9815.5	3130-39453		10529	1535-34625		0.2919	0.358447		0.9068	0.938479		0.9533	0.978061		0.1509	0.286106
N-acetylaspartic acid		903.5	525-23177		6714.5	618-34617		3587	439-75307		0.1873	0.319353			N-acetylaspartic acid		2148	602-19903		903.5	525-23177		6714.5	618-34617		3587	439-75307		0.101	0.149606		0.3798	0.559084		0.2919	0.473838		0.0283	0.124644
myristic acid		1575.5	394-9803		2744	1718-5135		2687	2235-5947		0.1873	0.319353			myristic acid		5831.5	1546-52450		1575.5	394-9803		2744	1718-5135		2687	2235-5947		0.0071	0.0184912		0.035	0.135984		0.035	0.150818		0.0696	0.177368
myo-inositol		9824a	6128-61651		6175.5b	2863-12889		6844.5a,b	3267-19833		0.0179	0.0986581			myo-inositol		9456.5	3488-44377		9824a	6128-61651		6175.5b	2863-12889		6844.5a,b	3267-19833		0.5582	0.632983		0.0261	0.112467		0.2188	0.42159		0.0082	0.114318
montanic acid		1724a	165-7366		3973.5a,b	213-11323		5174b	3260-9173		0.0179	0.0986581			montanic acid		9662.5	2766-19251		1724a	165-7366		3973.5a,b	213-11323		5174b	3260-9173		0.0006	0.00474		0.0164	0.0844957		0.0224	0.106176		0.1124	0.239989
methylmalonic acid		164259	52244-264171		132006	21000-214403		133068	57741-237676		0.9737	0.977826			methylmalonic acid		226174	20073-651515		164259	52244-264171		132006	21000-214403		133068	57741-237676		0.2416	0.309509		0.079	0.225578		0.0895	0.23056		0.3258	0.454204
methionine sulfoxide		19849.5	9466-53554		24774.5	10406-75023		31523	15927-83377		0.6013	0.716121			methionine sulfoxide		21983.5	7034-49087		19849.5	9466-53554		24774.5	10406-75023		31523	15927-83377		0.8148	0.862087		0.5195	0.665522		0.0695	0.196089		0.9397	0.943682
methionine		46767.5a	2504-74264		25166b	2223-58935		33594.5a,b	10285-124115		0.0259	0.107689			methionine		11021	3175-516429		46767.5a	2504-74264		25166b	2223-58935		33594.5a,b	10285-124115		0.0465	0.07347		0.3798	0.559084		0.0533	0.183074		0.0413	0.146091
melezitose		113.5	22-2661		293	72-8927		257.5	101-2469		0.3675	0.509342			melezitose		321	116-894		113.5	22-2661		293	72-8927		257.5	101-2469		0.0404	0.0674282		0.6819	0.784516		0.7034	0.809251		0.1509	0.286106
mannose		40535.5	679-175459		160662	5250-2148628		95167.5	2825-1632635		0.8302	0.890305			mannose		42515	2541-215024		40535.5	679-175459		160662	5250-2148628		95167.5	2825-1632635		1	1		0.0895	0.24104		0.1139	0.257089		0.1988	0.3318
mannitol		3310	436-15814		3613	535-21677		6610	888-16939		0.9737	0.977826			mannitol		6611.5	2521-22256		3310	436-15814		3613	535-21677		6610	888-16939		0.2188	0.286495		0.1139	0.275452		0.4124	0.592356		0.7055	0.770523
maltotriose		148	21-659		357.5	11-2724		526	98-24383		0.1352	0.273867			maltotriose		369.5	101-2637		148	21-659		357.5	11-2724		526	98-24383		0.0261	0.0472191		0.9533	0.961413		0.5386	0.686281		0.1736	0.309347
maltose		2981.5	296-53294		10332	1795-73909		8511.5	1798-651702		0.6013	0.716121			maltose		9476	3979-146296		2981.5	296-53294		10332	1795-73909		8511.5	1798-651702		0.0192	0.0392276		0.9068	0.938479		0.7253	0.818553		0.0588	0.162042
malonic acid		131	60-568		258.5	111-904		227	141-651		0.1873	0.319353			malonic acid		366	185-988		131	60-568		258.5	111-904		227	141-651		0.0118	0.0271515		0.1599	0.341408		0.1011	0.239607		0.0963	0.219453
malic acid		2572	283-20292		1156	111-3269		1664.5	878-3825		0.3159	0.453747			malic acid		1028	408-18021		2572	283-20292		1156	111-3269		1664.5	878-3825		0.3488	0.423926		0.7253	0.810831		0.1011	0.239607		0.2265	0.353161
maleimide		7742.5	1674-15282		14863.5	496-76068		14120.5	2867-60921		0.1873	0.319353			maleimide		13936.5	8141-43412		7742.5	1674-15282		14863.5	496-76068		14120.5	2867-60921		0.0013	0.00628776		0.9068	0.938479		0.8606	0.914629		0.0963	0.219453
lyxose		2720	385-15526		13823.5	1949-1113857		9331.5	2188-102638		0.3159	0.453747			lyxose		59239	963-773709		2720	385-15526		13823.5	1949-1113857		9331.5	2188-102638		0.0041	0.0127855		0.2659	0.459988		0.061	0.187753		0.0126	0.119124
lyxitol		1253.5a	457-13373		3880.5b	1326-22933		4652.5b	982-27775		0.0063	0.0612931			lyxitol		2713	1368-6164		1253.5a	457-13373		3880.5b	1326-22933		4652.5b	982-27775		0.0695	0.106958		0.3488	0.533326		0.1977	0.400469		0.0284	0.124644
lysine		117986	5796-410688		48153.5	12388-175752		147128	30245-412156		0.0665	0.17131			lysine		61308	1954-147703		117986	5796-410688		48153.5	12388-175752		147128	30245-412156		0.1432	0.204448		0.9533	0.961413		0.0118	0.0847455		0.4497	0.566909
lithocholic acid		874.5	166-13919		5583	616-57576		3691.5	656-40333		0.1873	0.319353			lithocholic acid		16218.5	651-34615		874.5	166-13919		5583	616-57576		3691.5	656-40333		0.0007	0.00474		0.1599	0.341408		0.2188	0.42159		0.0494	0.1482
linolenic acid		13709	8026-48275		12041.5	3569-38532		14834.5	3911-55375		0.8302	0.890305			linolenic acid		28363	3349-97095		13709	8026-48275		12041.5	3569-38532		14834.5	3911-55375		0.0303	0.0528022		0.0192	0.091008		0.0404	0.162285		0.6501	0.733684
linoleic acid		8298.5	1223-14893		14608	3938-28804		14156	5257-16982		0.0665	0.17131			linoleic acid		31360.5	2032-88546		8298.5	1223-14893		14608	3938-28804		14156	5257-16982		0.0004	0.00412174		0.0084	0.0737333		0.0028	0.0503625		0.0494	0.1482
lignoceric acid		1841	417-8652		2665	947-10057		3505	1912-5178		0.0665	0.17131			lignoceric acid		4766.5	2010-11567		1841	417-8652		2665	947-10057		3505	1912-5178		0.0071	0.0184912		0.061	0.20362		0.0404	0.162285		0.2568	0.382777
levoglucosan		498a	73-7836		1206b	618-4022		1156.5a,b	264-8556		0.0456	0.146043			levoglucosan		1910.5	341-5857		498a	73-7836		1206b	618-4022		1156.5a,b	264-8556		0.0164	0.0353345		0.3798	0.559084		0.2299	0.439406		0.0102	0.119124
leucine		1388396	344047-2242233		459852	192653-1171478		874518	192468-1540261		0.1873	0.319353			leucine		327359	36237-1183464		1388396	344047-2242233		459852	192653-1171478		874518	192468-1540261		0.001	0.00551163		0.2659	0.459988		0.061	0.187753		0.0156	0.119124
lauric acid		4962.5	2236-277770		86684	869-398802		17727	2141-789943		0.2223	0.35598			lauric acid		80308.5	6830-254586		4962.5	2236-277770		86684	869-398802		17727	2141-789943		0.0034	0.0113493		0.9533	0.961413		0.2188	0.42159		0.0191	0.119124
lauric acid		4396.5	498-29488		10189	2211-49303		12195	1132-81710		0.1873	0.319353			lauric acid		16676	1672-40111		4396.5	498-29488		10189	2211-49303		12195	1132-81710		0.0019	0.00818727		0.1432	0.323223		0.3488	0.540298		0.0963	0.219453
lactulose		3302	674-67192		2386	791-7031		4096	1635-25834		0.0665	0.17131			lactulose		6317	982-27446		3302	674-67192		2386	791-7031		4096	1635-25834		0.1977	0.264717		0.0533	0.185766		0.8148	0.877762		0.5453	0.652708
lactose		841.5	77-3013		2454.5	406-6328		1714.5	567-35908		0.1873	0.319353			lactose		2486.5	205-4968		841.5	77-3013		2454.5	406-6328		1714.5	567-35908		0.0303	0.0528022		0.4823	0.642163		0.4823	0.645792		0.0343	0.137781
lactic acid		14493.5	666-707803		25027	7437-777603		9019.5	2701-355400		0.2223	0.35598			lactic acid		11435	2355-1032125		14493.5	666-707803		25027	7437-777603		9019.5	2701-355400		1	1		0.1599	0.341408		0.7253	0.818553		0.4057	0.537156
kynurenic acid		1176	455-30075		1251.5	428-19784		1348	310-35181		0.9999	0.9999			kynurenic acid		1068	516-2936		1176	455-30075		1251.5	428-19784		1348	310-35181		0.2659	0.331675		0.6395	0.761616		0.5195	0.665522		0.6501	0.733684
ketohexose		133.5	38-605		313	111-779		334	147-1097		0.4362	0.571157			ketohexose		446	142-1170		133.5	38-605		313	111-779		334	147-1097		0.0059	0.0170524		0.1977	0.384057		0.5195	0.665522		0.0821	0.202684
isothreonic acid		537a	157-2703		1457b	434-46273		2334b	71-7022		0.0075	0.0612931			isothreonic acid		1706.5	370-5267		537a	157-2703		1457b	434-46273		2334b	71-7022		0.01	0.024433		0.4465	0.618833		0.5982	0.727043		0.0233	0.120046
isothreitol		820a	86-4758		1480.5a,b	347-5831		2719b	622-4867		0.0179	0.0986581			isothreitol		1875	294-6780		820a	86-4758		1480.5a,b	347-5831		2719b	622-4867		0.1781	0.239828		0.8606	0.910546		0.4465	0.626157		0.1736	0.309347
isopentadecanoic acid		20491	7465-41367		21161	5574-47958		25933.5	13081-47694		0.6013	0.716121			isopentadecanoic acid		82271	16307-161960		20491	7465-41367		21161	5574-47958		25933.5	13081-47694		0.0004	0.00412174		0.0013	0.0316		0.0019	0.0503625		0.5967	0.693225
isomaltose		499a	215-17490		1542.5b	412-2812		755.5a,b	323-20472		0.0303	0.119685			isomaltose		856.5	357-38883		499a	215-17490		1542.5b	412-2812		755.5a,b	323-20472		0.079	0.120019		0.2416	0.433782		0.7697	0.852425		0.0233	0.120046
isoleucine		615648	178619-947070		253066	74201-867662		559666	113866-1258176		0.4362	0.571157			isoleucine		164067	24318-630607		615648	178619-947070		253066	74201-867662		559666	113866-1258176		0.0008	0.00474		0.3195	0.511632		0.0303	0.138098		0.0963	0.219453
isoheptadecanoic acid NIST		3151.5	226-12160		2163.5	429-2591		2253.5	1311-4474		0.3159	0.453747			isoheptadecanoic acid NIST		4539.5	591-13818		3151.5	226-12160		2163.5	429-2591		2253.5	1311-4474		0.1781	0.239828		0.0041	0.0539833		0.0192	0.106176		0.1988	0.3318
inosine		377.5a	77-864		3172b	268-8150		1902.5b	816-11865		0.0001	0.01185			inosine		1667	658-10040		377.5a	77-864		3172b	268-8150		1902.5b	816-11865		0.0003	0.00374211		0.8148	0.88177		0.5582	0.699965		0.0052	0.0962812
indole-3-propionic acid		58219	18245-157267		78582.5	3741-134084		129540	5293-212956		0.1352	0.273867			indole-3-propionic acid		62123	1805-228757		58219	18245-157267		78582.5	3741-134084		129540	5293-212956		0.9068	0.934398		0.9533	0.961413		0.3488	0.540298		0.7624	0.795986
indole-3-lactate		380.5a	53-12850		3790a,b	926-15207		6841b	1218-24175		0.0115	0.0757083			indole-3-lactate		12887.5	3020-57865		380.5a	53-12850		3790a,b	926-15207		6841b	1218-24175		0.0007	0.00474		0.0034	0.05372		0.061	0.187753		0.0191	0.119124
indole-3-acetate		729a	221-3814		2049a,b	938-3534		2650.5b	635-5598		0.0179	0.0986581			indole-3-acetate		6421	1113-13571		729a	221-3814		2049a,b	938-3534		2650.5b	635-5598		0.0002	0.0029625		0.0071	0.067308		0.0164	0.0948		0.0041	0.0962812
hypoxanthine		1782a	127-14247		11747a,b	3107-37811		9923.5b	3687-42542		0.0259	0.107689			hypoxanthine		7810.5	1139-14765		1782a	127-14247		11747a,b	3107-37811		9923.5b	3687-42542		0.0465	0.07347		0.2416	0.433782		0.3195	0.508198		0.0065	0.0962812
hydroxycarbamate NIST		5215	1669-18845		8448	2642-38820		10263.5	4671-24005		0.0665	0.17131			hydroxycarbamate NIST		24831.5	3057-56328		5215	1669-18845		8448	2642-38820		10263.5	4671-24005		0.001	0.00551163		0.0139	0.0823575		0.0224	0.106176		0.2265	0.353161
hydroquinone		544.5	75-1767		1126.5	401-6344		1181.5	508-2350		0.0924	0.21261			hydroquinone		1834.5	1007-4637		544.5	75-1767		1126.5	401-6344		1181.5	508-2350		0.0008	0.00474		0.0695	0.222588		0.0404	0.162285		0.0756	0.190609
hydrocinnamic acid		21571	5390-37478		16257.5	4108-50877		19756.5	5898-334058		0.3159	0.453747			hydrocinnamic acid		13511.5	2295-510723		21571	5390-37478		16257.5	4108-50877		19756.5	5898-334058		0.1781	0.239828		0.4465	0.618833		0.4124	0.592356		0.3643	0.496202
homoserine		261a	88-772		894b	540-1462		849a,b	477-2008		0.0034	0.05372			homoserine		1182.5	679-1863		261a	88-772		894b	540-1462		849a,b	477-2008		0.0001	0.0029625		0.0533	0.185766		0.1432	0.311361		0.0005	0.0962812
hexuronic acid		2476	412-21598		6812.5	1273-203578		7681.5	2483-121158		0.3159	0.453747			hexuronic acid		5871.5	664-38147		2476	412-21598		6812.5	1273-203578		7681.5	2483-121158		0.2188	0.286495		0.6819	0.784516		0.3195	0.508198		0.1306	0.264549
hexadecylglycerol NIST		3745.5	140-33499		3114.5	991-28377		3905.5	1047-31981		0.6013	0.716121			hexadecylglycerol NIST		5587	1380-19871		3745.5	140-33499		3114.5	991-28377		3905.5	1047-31981		0.2919	0.358447		0.1781	0.360767		0.5195	0.665522		0.7624	0.795986
heptadecanoic acid		8061	2249-34260		7596.5	4968-12631		8832	4137-10141		0.9737	0.977826			heptadecanoic acid		16623.5	4634-33387		8061	2249-34260		7596.5	4968-12631		8832	4137-10141		0.035	0.0596763		0.0013	0.0316		0.0006	0.0503625		0.8798	0.894904
guanosine		227a	140-1814		879.5b	300-3425		965.5b	646-6311		0.0001	0.01185			guanosine		1021.5	639-7896		227a	140-1814		879.5b	300-3425		965.5b	646-6311		0.0071	0.0184912		0.1599	0.341408		0.9068	0.946747		0.0413	0.146091
guanine		410.5	163-3955		1105	398-3537		1930.5	574-5153		0.0665	0.17131			guanine		1530.5	481-3633		410.5	163-3955		1105	398-3537		1930.5	574-5153		0.0192	0.0392276		0.4464	0.618833		0.6605	0.774943		0.0695	0.177368
glycyl-proline		2589.5a	855-18172		12820.5b	3131-35814		6991a,b	2365-23922		0.0259	0.107689			glycyl-proline		8174	2288-35081		2589.5a	855-18172		12820.5b	3131-35814		6991a,b	2365-23922		0.0261	0.0472191		0.6395	0.761616		0.5195	0.665522		0.0156	0.119124
glycyl tyrosine		566.5	156-2067		1688	444-5073		1298	717-5132		0.0781	0.185097			glycyl tyrosine		1287	629-3180		566.5	156-2067		1688	444-5073		1298	717-5132		0.0465	0.07347		0.6395	0.761616		0.3798	0.5697		0.0343	0.137781
glycolic acid		4342.5	1011-13512		8816	3051-45380		11215	4284-19911		0.0781	0.185097			glycolic acid		14454	1021-25646		4342.5	1011-13512		8816	3051-45380		11215	4284-19911		0.0071	0.0184912		0.1977	0.384057		0.3488	0.540298		0.0343	0.137781
glycine		148112	36468-946258		108173	19138-597943		74376	41429-126893		0.3159	0.453747			glycine		69043.5	27646-203348		148112	36468-946258		108173	19138-597943		74376	41429-126893		0.061	0.0944902		0.6395	0.761616		0.8148	0.877762		0.2265	0.353161
glycerol-alpha-phosphate		1555	426-3089		2123.5	479-7814		1503.5	416-10632		0.3675	0.509342			glycerol-alpha-phosphate		2476.5	1284-7658		1555	426-3089		2123.5	479-7814		1503.5	416-10632		0.0224	0.043161		0.2416	0.433782		0.2188	0.42159		0.4725	0.589382
glycerol-3-galactoside		2933.5	693-36176		3358.5	1181-8519		4011	897-11090		0.9737	0.977826			glycerol-3-galactoside		2470	1386-4993		2933.5	693-36176		3358.5	1181-8519		4011	897-11090		0.4823	0.563079		0.2919	0.487185		0.2416	0.44387		0.8206	0.849267
glycerol		167268	62558-423672		134516	69914-347297		192503	86254-375911		0.8302	0.890305			glycerol		162034	59529-365464		167268	62558-423672		134516	69914-347297		192503	86254-375911		0.9533	0.969666		0.4465	0.618833		0.6819	0.792207		0.7624	0.795986
glyceric acid		5744	1279-19999		5728	3369-55786		6592	2489-30640		0.3675	0.509342			glyceric acid		12209.5	2866-15378		5744	1279-19999		5728	3369-55786		6592	2489-30640		0.079	0.120019		0.0895	0.24104		0.1781	0.370261		0.4497	0.566909
glutaric acid		469.5	54-1441		541	222-1514		535.5	258-1339		0.8302	0.890305			glutaric acid		1041.5	567-2634		469.5	54-1441		541	222-1514		535.5	258-1339		0.0071	0.0184912		0.079	0.225578		0.01	0.0817241		0.2568	0.382777
glutamine		4629.5	206-19060		3782.5	317-17886		5481.5	652-17734		0.2223	0.35598			glutamine		1960.5	575-7826		4629.5	206-19060		3782.5	317-17886		5481.5	652-17734		0.1599	0.222919		0.2188	0.42159		0.0895	0.23056		0.6501	0.733684
glutamic acid		220926	24927-537811		108595	28764-1073036		157114	85228-333134		0.8302	0.890305			glutamic acid		87470	29386-217516		220926	24927-537811		108595	28764-1073036		157114	85228-333134		0.0084	0.0214065		0.3195	0.511632		0.0164	0.0948		0.2265	0.353161
glucuronic acid		2776.5	176-11353		2960.5	422-19579		3031.5	749-82106		0.6013	0.716121			glucuronic acid		1966	775-5865		2776.5	176-11353		2960.5	422-19579		3031.5	749-82106		1	1		0.8606	0.910546		0.5195	0.665522		0.4057	0.537156
glucose-1-phosphate		1476	383-5676		3764	1297-10165		3910.5	1306-12352		0.0665	0.17131			glucose-1-phosphate		3752.5	1632-8023		1476	383-5676		3764	1297-10165		3910.5	1306-12352		0.0118	0.0271515		0.6395	0.761616		0.8148	0.877762		0.0343	0.137781
glucose		20706.5	1068-223321		56321.5	27478-176137		34485.5	13081-427158		0.4362	0.571157			glucose		21541	4929-81588		20706.5	1068-223321		56321.5	27478-176137		34485.5	13081-427158		0.6819	0.751676		0.0139	0.0823575		0.1011	0.239607		0.0494	0.1482
galacturonic acid		2159a	103-10658		6168b	987-184744		6680.5a,b	1610-106397		0.0456	0.146043			galacturonic acid		4538	1104-33722		2159a	103-10658		6168b	987-184744		6680.5a,b	1610-106397		0.0895	0.133406		0.4465	0.618833		0.2659	0.466802		0.0413	0.146091
galactonic acid		335a	78-1166		933.5b	412-3157		1192.5b	169-1633		0.0013	0.05135			galactonic acid		1610	510-9780		335a	78-1166		933.5b	412-3157		1192.5b	169-1633		0.0002	0.0029625		0.061	0.20362		0.0465	0.17775		0.0025	0.0962812
galactinol		1009.5	162-119666		1442.5	748-5368		1495	437-7265		0.9737	0.977826			galactinol		2939.5	1115-4663		1009.5	162-119666		1442.5	748-5368		1495	437-7265		0.1279	0.185965		0.1278	0.305945		0.0895	0.23056		0.4961	0.603195
fumaric acid		2885	1859-8921		2514.5	1408-4832		3524.5	1498-8471		0.6013	0.716121			fumaric acid		1929	649-3862		2885	1859-8921		2514.5	1408-4832		3524.5	1498-8471		0.0261	0.0472191		0.1431	0.323223		0.0118	0.0847455		0.2263	0.353161
fucose		41179	8000-131636		41376	12322-285285		52959	11328-147568		0.4362	0.571157			fucose		49731	11545-120169		41179	8000-131636		41376	12322-285285		52959	11328-147568		0.8606	0.898512		0.6395	0.761616		0.7697	0.852425		0.3643	0.496202
fructose		2537a	409-75636		5128a	1448-16690		6232a	3052-9477		0.0482	0.152312			fructose		3597.5	603-35252		2537a	409-75636		5128a	1448-16690		6232a	3052-9477		0.4823	0.563079		0.1432	0.323223		0.01	0.0817241		0.1306	0.264549
ferulic acid		188.5	46-2589		680.5	247-2398		684	192-4457		0.1873	0.319353			ferulic acid		2085.5	545-5845		188.5	46-2589		680.5	247-2398		684	192-4457		0.0023	0.00879194		0.01	0.0764516		0.0465	0.17775		0.0588	0.162042
ethanolamine		54661.5	18028-272244		41138	24237-159191		53618	33008-103206		0.4362	0.571157			ethanolamine		57298.5	22134-105724		54661.5	18028-272244		41138	24237-159191		53618	33008-103206		0.6395	0.711556		0.0224	0.100166		0.4124	0.592356		0.5967	0.693225
erythrose		120	41-603		372	140-1265		314	166-921		0.0781	0.185097			erythrose		536.5	176-1180		120	41-603		372	140-1265		314	166-921		0.0041	0.0127855		0.1977	0.384057		0.2659	0.466802		0.0284	0.124644
enolpyruvate NIST		232	57-906		621	387-1254		847.5	280-2381		0.0781	0.185097			enolpyruvate NIST		1334.5	504-2301		232	57-906		621	387-1254		847.5	280-2381		0.0002	0.0029625		0.0071	0.067308		0.079	0.215207		0.0156	0.119124
docosahexaenoic acid		3124.5	581-12504		3509	1179-33469		4725	2485-10048		0.6013	0.716121			docosahexaenoic acid		6499.5	926-27074		3124.5	581-12504		3509	1179-33469		4725	2485-10048		0.1781	0.239828		0.3488	0.533326		0.4823	0.645792		0.4497	0.566909
dihydrocholesterol		358.5	182-780		251.5	60-4308		335	119-2292		0.8973	0.957928			dihydrocholesterol		2681.5	195-5705		358.5	182-780		251.5	60-4308		335	119-2292		0.0002	0.0029625		0.0071	0.067308		0.0041	0.0539833		0.4272	0.56248
digalacturonic acid		247	54-2295		478	178-1259		565.5	139-870		0.0781	0.185097			digalacturonic acid		489	302-4159		247	54-2295		478	178-1259		565.5	139-870		0.0041	0.0127855		0.464	0.639349		0.4819	0.645792		0.0191	0.119124
D-erythro-sphingosine		3344	1012-54894		6619.5	1709-106336		6716	1929-29845		0.3159	0.453747			D-erythro-sphingosine		20636	3699-114858		3344	1012-54894		6619.5	1709-106336		6716	1929-29845		0.0084	0.0214065		0.0261	0.112467		0.061	0.187753		0.2899	0.413893
deoxycholic acid		36815	2159-403929		139444	12934-2240532		248706	5892-2044781		0.4362	0.571157			deoxycholic acid		525226	12668-2035082		36815	2159-403929		139444	12934-2240532		248706	5892-2044781		0.0019	0.00818727		0.1781	0.360767		0.2188	0.42159		0.0963	0.219453
daidzein		94.5a	20-629		350b	156-1119		325b	124-2075		0.0063	0.0612931			daidzein		759	74-11581		94.5a	20-629		350b	156-1119		325b	124-2075		0.0019	0.00818727		0.2659	0.459988		0.2919	0.473838		0.0046	0.0962812
cystine		740.5	451-13464		1011	487-2338		1069.5	685-1906		0.4362	0.571157			cystine		1056.5	442-2143		740.5	451-13464		1011	487-2338		1069.5	685-1906		0.7697	0.821707		0.8606	0.910546		0.4823	0.645792		0.7055	0.770523
cysteine		1520	88-2950		827	226-2216		807.5	258-3948		0.7103	0.801624			cysteine		877	189-1530		1520	88-2950		827	226-2216		807.5	258-3948		0.3798	0.459248		0.8836	0.930725		0.5982	0.727043		0.4057	0.537156
cyanoalanine		605a,b	65-2647		556.5a	244-1161		1266b	570-3763		0.0034	0.05372			cyanoalanine		748	253-1311		605a,b	65-2647		556.5a	244-1161		1266b	570-3763		0.7697	0.821707		0.4124	0.588788		0.035	0.150818		0.8206	0.849267
creatinine		7259.5a	311-35632		16618b	1310-86436		8040a,b	1969-75908		0.0456	0.146043			creatinine		3805	865-66975		7259.5a	311-35632		16618b	1310-86436		8040a,b	1969-75908		0.8148	0.862087		0.079	0.225578		0.2919	0.473838		0.2265	0.353161
creatine		7059a	311-35632		17152.5b	1310-87904		8644.5a,b	1969-74553		0.0456	0.146043			creatine		3939.5	865-63162		7059a	311-35632		17152.5b	1310-87904		8644.5a,b	1969-74553		0.9533	0.969666		0.079	0.225578		0.2919	0.473838		0.2265	0.353161
conduritol-beta-epoxide		1088.5	150-22850		876.5	291-8015		988	233-11242		0.8302	0.890305			conduritol-beta-epoxide		1058.5	375-2242		1088.5	150-22850		876.5	291-8015		988	233-11242		0.8606	0.898512		0.5195	0.665522		0.8606	0.914629		0.7624	0.795986
citrulline		10469a,b	1424-14246		8852a	3605-60741		27940.5b	5188-38743		0.0259	0.107689			citrulline		6425.5	2341-12903		10469a,b	1424-14246		8852a	3605-60741		27940.5b	5188-38743		0.1781	0.239828		0.1599	0.341408		0.0059	0.069915		0.8798	0.894904
citric acid		465.5	124-986		270.5	180-677		355.5	175-2333		0.1873	0.319353			citric acid		584.5	165-2406		465.5	124-986		270.5	180-677		355.5	175-2333		0.5982	0.671912		0.1432	0.323223		1	1		0.2899	0.413893
citramalic acid		225	31-1562		531.5	197-1054		602	196-1963		0.1873	0.319353			citramalic acid		809	420-1867		225	31-1562		531.5	197-1054		602	196-1963		0.0139	0.0310783		0.0789	0.225578		0.3194	0.508198		0.1306	0.264549
cis-gondoic acid		358.5	76-1825		472.5	212-1860		647.5	129-1765		0.3675	0.509342			cis-gondoic acid		927	148-1838		358.5	76-1825		472.5	212-1860		647.5	129-1765		0.0533	0.0836563		0.1139	0.275452		0.2659	0.466802		0.7055	0.770523
cholic acid		39721.5	1094-1925040		44086.5	2551-705215		11218	2473-1520547		0.9737	0.977826			cholic acid		23775.5	262-226757		39721.5	1094-1925040		44086.5	2551-705215		11218	2473-1520547		0.4823	0.563079		0.7697	0.844532		0.5195	0.665522		0.7624	0.795986
cholesterone		169.5	56-2745		139	43-619		181.5	66-1205		0.7103	0.801624			cholesterone		356.5	92-686		169.5	56-2745		139	43-619		181.5	66-1205		0.1432	0.204448		0.1781	0.360767		0.2659	0.466802		0.6775	0.760983
cholesterol		85467.5	603-376319		45739	437-145736		61932	2587-120691		0.7103	0.801624			cholesterol		160706	46398-429700		85467.5	603-376319		45739	437-145736		61932	2587-120691		0.1279	0.185965		0.0019	0.0346385		0.0013	0.0503625		0.3258	0.454204
chlorogenic acid		91.5	27-6484		209	73-416		235.5	109-486		0.4362	0.571157			chlorogenic acid		399	126-655		91.5	27-6484		209	73-416		235.5	109-486		0.0192	0.0392276		0.0151	0.0844957		0.035	0.150818		0.1124	0.239989
chenodeoxycholic acid		3456	101-20337		4002	1468-8372		1995	976-19108		0.6013	0.716121			chenodeoxycholic acid		6147	2988-17432		3456	101-20337		4002	1468-8372		1995	976-19108		0.061	0.0944902		0.079	0.225578		0.0224	0.106176		0.4057	0.537156
cerotinic acid		1036	222-4774		1946	855-6525		1847.5	951-5441		0.1352	0.273867			cerotinic acid		3136	1214-8067		1036	222-4774		1946	855-6525		1847.5	951-5441		0.0034	0.0113493		0.1139	0.275452		0.079	0.215207		0.0588	0.162042
cellobiose		2977.5	749-68114		7598.5	2164-36558		9364.5	2351-155138		0.3159	0.453747			cellobiose		14180.5	2737-40275		2977.5	749-68114		7598.5	2164-36558		9364.5	2351-155138		0.035	0.0596763		0.4823	0.642163		0.2659	0.466802		0.1509	0.286106
catechin		67.5	13-859		216	87-944		217	81-689		0.1873	0.319353			catechin		453.5	125-4944		67.5	13-859		216	87-944		217	81-689		0.0023	0.00879194		0.0303	0.123812		0.0059	0.069915		0.0284	0.124644
capric acid		406.5a	171-1114		758.5b	626-3358		1066.5b	393-2304		0.0075	0.0612931			capric acid		2555.5	482-6457		406.5a	171-1114		758.5b	626-3358		1066.5b	393-2304		0.0004	0.00412174		0.035	0.135984		0.0533	0.183074		0.0065	0.0962812
butyrolactam NIST		6222.5	224-11401		8450	289-20325		9059.5	5180-14874		0.7103	0.801624			butyrolactam NIST		10122.5	4855-15903		6222.5	224-11401		8450	289-20325		9059.5	5180-14874		0.0303	0.0528022		0.6819	0.784516		0.3798	0.5697		0.1988	0.3318
beta-sitosterol		6240	447-53329		17724	8383-52775		27149.5	1323-45769		0.1873	0.319353			beta-sitosterol		59854	24808-112566		6240	447-53329		17724	8383-52775		27149.5	1323-45769		0.0002	0.0029625		0.0008	0.0316		0.0034	0.0503625		0.0588	0.162042
beta-glutamic acid		617	117-9020		382.5	77-3468		281	146-4207		0.6013	0.716121			beta-glutamic acid		508	125-2160		617	117-9020		382.5	77-3468		281	146-4207		0.4823	0.563079		1	1		0.7253	0.818553		0.4963	0.603195
beta-gentiobiose		1141.5	135-11786		2681.5	663-8972		2767.5	594-14319		0.7103	0.801624			beta-gentiobiose		2022	862-23231		1141.5	135-11786		2681.5	663-8972		2767.5	594-14319		0.4124	0.496136		0.7253	0.810831		0.6819	0.792207		0.3258	0.454204
beta-alanine		1277.5a	201-26243		10007b	667-35440		6227.5a,b	3768-34297		0.0259	0.107689			beta-alanine		16438.5	1490-199658		1277.5a	201-26243		10007b	667-35440		6227.5a,b	3768-34297		0.001	0.00551163		0.3488	0.533326		0.4465	0.626157		0.0156	0.119124
beta sitosterol		6711a	342-54361		18134.5a,b	8383-52759		28675b	11294-46889		0.0456	0.146043			beta sitosterol		66809	3536-122494		6711a	342-54361		18134.5a,b	8383-52759		28675b	11294-46889		0.0007	0.00474		0.0049	0.058065		0.0139	0.0915083		0.0696	0.177368
benzoic acid		6159.5a	1362-18012		9566.5a,b	2998-24335		14814.5b	4734-28049		0.0115	0.0757083			benzoic acid		24344.5	6401-49461		6159.5a	1362-18012		9566.5a,b	2998-24335		14814.5b	4734-28049		0.0006	0.00474		0.0041	0.0539833		0.1139	0.257089		0.2265	0.353161
behenic acid		8199	473-35555		13861.5	9136-59804		17144.5	8396-48061		0.1873	0.319353			behenic acid		25192.5	5530-53241		8199	473-35555		13861.5	9136-59804		17144.5	8396-48061		0.0139	0.0310783		0.1781	0.360767		0.1279	0.283293		0.0963	0.219453
azelaic acid		295.5a	96-1823		605.5b	314-1856		729.5b	475-1437		0.0075	0.0612931			azelaic acid		869	206-2927		295.5a	96-1823		605.5b	314-1856		729.5b	475-1437		0.01	0.024433		0.3195	0.511632		0.4465	0.626157		0.0156	0.119124
aspartic acid		80764a	10984-377824		16456.5b	8178-67973		37367.5a,b	17470-103969		0.0063	0.0612931			aspartic acid		16412.5	4380-52514		80764a	10984-377824		16456.5b	8178-67973		37367.5a,b	17470-103969		0.0013	0.00628776		0.7253	0.810831		0.0019	0.0503625		0.0041	0.0962812
asparagine		4375a,b	969-30285		3421a	2080-7122		7145b	3678-15635		0.0034	0.05372			asparagine		4101	1968-5878		4375a,b	969-30285		3421a	2080-7122		7145b	3678-15635		0.5982	0.671912		0.5582	0.699965		0.0023	0.0503625		0.4497	0.566909
arachidonic acid		10841.5	3854-179749		16389.5	4223-112025		14104.5	3286-80398		0.9737	0.977826			arachidonic acid		14638.5	5999-46578		10841.5	3854-179749		16389.5	4223-112025		14104.5	3286-80398		0.7253	0.792148		0.8606	0.910546		0.7697	0.852425		0.9397	0.943682
arachidic acid		6700.5	406-21159		8380	5214-33520		12028.5	3092-23698		0.3159	0.453747			arachidic acid		17130	3319-29375		6700.5	406-21159		8380	5214-33520		12028.5	3092-23698		0.0224	0.043161		0.1139	0.275452		0.0695	0.196089		0.3643	0.496202
arabitol		630	431-5221		5180	843-21776		2313	926-26836		0.1873	0.319353			arabitol		2412	997-5588		630	431-5221		5180	843-21776		2313	926-26836		0.0164	0.0353345		0.1432	0.323223		0.7697	0.852425		0.0041	0.0962812
arabinose		8995a,b	1232-60826		39029.5b	5735-130948		30218b	13818-232609		0.0075	0.0612931			arabinose		55384.5	7593-160731		8995a,b	1232-60826		39029.5b	5735-130948		30218b	13818-232609		0.0019	0.00818727		0.2919	0.487185		0.4823	0.645792		0.0126	0.119124
aminomalonate		1809.5	512-5126		1277	426-6148		1625.5	929-2762		0.3159	0.453747			aminomalonate		1560.5	677-3763		1809.5	512-5126		1277	426-6148		1625.5	929-2762		0.5006	0.581579		0.5195	0.665522		0.7253	0.818553		0.4725	0.589382
alpha-ketoglutarate		170	42-412		168.5	97-374		261.5	83-384		0.9737	0.977826			alpha-ketoglutarate		395.5	68-800		170	42-412		168.5	97-374		261.5	83-384		0.0164	0.0353345		0.01	0.0764516		0.0533	0.183074		0.7336	0.795986
alanine-alanine		4557a	1508-31338		9222.5a,b	3302-31525		15000b	2377-33556		0.0115	0.0757083			alanine-alanine		8065.5	2286-31005		4557a	1508-31338		9222.5a,b	3302-31525		15000b	2377-33556		0.2416	0.309509		0.6395	0.761616		0.1432	0.311361		0.0696	0.177368
alanine		359196	62474-1107174		253698	25293-904587		418209	92922-738403		0.6013	0.716121			alanine		347142	129393-721237		359196	62474-1107174		253698	25293-904587		418209	92922-738403		0.7697	0.821707		0.2416	0.433782		0.4823	0.645792		0.2899	0.413893
adipic acid		801.5	345-6673		1420.5	773-3351		1773	752-3055		0.3159	0.453747			adipic acid		3106	1142-7000		801.5	345-6673		1420.5	773-3351		1773	752-3055		0.0028	0.0103687		0.0041	0.0539833		0.01	0.0817241		0.1124	0.239989
adenosine		558	95-3143		986.5	511-4894		1409	634-5410		0.1352	0.273867			adenosine		2935	1046-9488		558	95-3143		986.5	511-4894		1409	634-5410		0.0006	0.00474		0.0016	0.0316		0.0084	0.079632		0.0821	0.202684
adenine		1170.5a	339-6539		3535.5b	901-64752		4569a,b	603-48451		0.0259	0.107689			adenine		5304	1930-23804		1170.5a	339-6539		3535.5b	901-64752		4569a,b	603-48451		0.0034	0.0113493		0.2416	0.433782		0.6395	0.754037		0.0413	0.146091
6-hydroxynicotinic acid		289.5	33-2047		547.5	171-1693		830.5	308-3327		0.1352	0.273867			6-hydroxynicotinic acid		2154	409-13856		289.5	33-2047		547.5	171-1693		830.5	308-3327		0.0005	0.00474		0.0013	0.0316		0.0224	0.106176		0.1736	0.309347
6-deoxyglucose		145838	25684-531263		171657	39967-1111782		184366	48554-515191		0.9737	0.977826			6-deoxyglucose		132718	34366-382101		145838	25684-531263		171657	39967-1111782		184366	48554-515191		0.6395	0.711556		0.2659	0.459988		0.2919	0.473838		0.5453	0.652708
5-aminovaleric acid		429510	3844-2012046		800142	9450-2847626		732910	323099-1588905		0.0781	0.185097			5-aminovaleric acid		983659	6315-2334972		429510	3844-2012046		800142	9450-2847626		732910	323099-1588905		0.0465	0.07347		0.8148	0.88177		0.4124	0.592356		0.0588	0.162042
4-hydroxyphenylacetic acid		3790a	308-19501		8169a,b	2177-24912		20630.5b	1285-77969		0.002	0.0526667			4-hydroxyphenylacetic acid		18976.5	2572-47950		3790a	308-19501		8169a,b	2177-24912		20630.5b	1285-77969		0.0013	0.00628776		0.0303	0.123812		0.9533	0.978061		0.1124	0.239989
4-hydroxymandelic acid		627	69-3040		599.5	281-4209		689	330-9133		0.4362	0.571157			4-hydroxymandelic acid		1970.5	272-19126		627	69-3040		599.5	281-4209		689	330-9133		0.0224	0.043161		0.0303	0.123812		0.0695	0.196089		0.7055	0.770523
4-hydroxybutyric acid		996a	459-3370		6850b	347-87429		4700b	1160-16242		0.0063	0.0612931			4-hydroxybutyric acid		6459.5	1367-33175		996a	459-3370		6850b	347-87429		4700b	1160-16242		0.0006	0.00474		1	1		0.2919	0.473838		0.0191	0.119124
4-hydroxybenzoate		1180.5a	602-9380		5352.5a,b	1074-20088		3758b	1066-24470		0.0115	0.0757083			4-hydroxybenzoate		13219	1576-68698		1180.5a	602-9380		5352.5a,b	1074-20088		3758b	1066-24470		0.0004	0.00412174		0.0164	0.0844957		0.0164	0.0948		0.0284	0.124644
4-aminobutyric acid		1365	199-15344		4021.5	294-117067		9021.5	345-34252		0.0665	0.17131			4-aminobutyric acid		3365	99-14420		1365	199-15344		4021.5	294-117067		9021.5	345-34252		0.5195	0.597677		0.3798	0.559084		0.1011	0.239607		0.1736	0.309347
3-phenyllactic acid		783.5	84-15953		3280	682-17198		1694	398-15708		0.1352	0.273867			3-phenyllactic acid		2716.5	901-26886		783.5	84-15953		3280	682-17198		1694	398-15708		0.0404	0.0674282		0.6819	0.784516		0.3798	0.5697		0.0413	0.146091
3-hydroxypropionic acid		1831a	674-58112		15729.5b	3343-112982		15883.5b	667-93422		0.0008	0.0474			3-hydroxypropionic acid		13674	3131-79174		1831a	674-58112		15729.5b	3343-112982		15883.5b	667-93422		0.0013	0.00628776		0.9533	0.961413		0.6395	0.754037		0.0065	0.0962812
3-hydroxypalmitic acid		331.5	126-921		503.5	317-2528		584	389-3094		0.1352	0.273867			3-hydroxypalmitic acid		2663	170-4080		331.5	126-921		503.5	317-2528		584	389-3094		0.0002	0.0029625		0.0016	0.0316		0.0041	0.0539833		0.0963	0.219453
3-hydroxybutyric acid		2800.5	1118-16809		7907	2191-25755		8541.5	1519-27624		0.2223	0.35598			3-hydroxybutyric acid		8986	2086-336259		2800.5	1118-16809		7907	2191-25755		8541.5	1519-27624		0.0118	0.0271515		0.5195	0.665522		0.4465	0.626157		0.0494	0.1482
3-hydroxy-3-methylglutaric acid		87a	27-1403		256.5a,b	73-4351		298.5b	185-5779		0.0179	0.0986581			3-hydroxy-3-methylglutaric acid		565.5	145-3789		87a	27-1403		256.5a,b	73-4351		298.5b	185-5779		0.0118	0.0271515		0.1139	0.275452		0.061	0.187753		0.1211	0.256256
3-aminoisobutyric acid		211	23-414		415	187-1429		327.5	116-957		0.1352	0.273867			3-aminoisobutyric acid		467.5	166-2571		211	23-414		415	187-1429		327.5	116-957		0.0071	0.0184912		0.6819	0.784516		0.0533	0.183074		0.0102	0.119124
3,4-dihydroxyphenylacetic acid		272a	53-5756		934.5a,b	238-33190		1397.5b	269-4000		0.0303	0.119685			3,4-dihydroxyphenylacetic acid		1027	283-4463		272a	53-5756		934.5a,b	238-33190		1397.5b	269-4000		0.0224	0.043161		0.2919	0.487185		0.8148	0.877762		0.0413	0.146091
3,4-dihydroxyhydrocinnamic acid NIST		23786	1556-365560		108992	16124-263098		133803	19727-379740		0.3159	0.453747			3,4-dihydroxyhydrocinnamic acid NIST		92418.5	3007-538032		23786	1556-365560		108992	16124-263098		133803	19727-379740		0.0261	0.0472191		0.7253	0.810831		0.2416	0.44387		0.0284	0.124644
3,4-dihydroxycinnamic acid		977.5	125-42218		2066	1517-3416		1896.5	546-5702		0.3159	0.453747			3,4-dihydroxycinnamic acid		1934.5	1173-5370		977.5	125-42218		2066	1517-3416		1896.5	546-5702		0.1599	0.222919		0.7697	0.844532		0.9068	0.946747		0.1736	0.309347
3,4-dihydroxybenzoic acid		867a	161-18700		7279.5b	148-45329		9802.5b	986-33602		0.0075	0.0612931			3,4-dihydroxybenzoic acid		6443.5	919-19554		867a	161-18700		7279.5b	148-45329		9802.5b	986-33602		0.0164	0.0353345		0.3195	0.511632		0.4124	0.592356		0.0494	0.1482
3-(4-hydroxyphenyl)propionic acid		1376.5a	161-14231		13003.5b	1671-74656		19698b	5529-152590		0.0063	0.0612931			3-(4-hydroxyphenyl)propionic acid		39760.5	6929-124723		1376.5a	161-14231		13003.5b	1671-74656		19698b	5529-152590		0.0001	0.0029625		0.035	0.135984		0.2919	0.473838		0.0065	0.0962812
3-(3-hydroxyphenyl)propionic acid		821	151-3245		1807	590-101438		1651	632-91515		0.1352	0.273867			3-(3-hydroxyphenyl)propionic acid		54732	1297-304153		821	151-3245		1807	590-101438		1651	632-91515		0.0001	0.0029625		0.0049	0.058065		0.0084	0.079632		0.0233	0.120046
2-monoolein		2671.5	592-15421		6155.5	1050-40526		6815	2420-25510		0.7103	0.801624			2-monoolein		25354.5	4933-97746		2671.5	592-15421		6155.5	1050-40526		6815	2420-25510		0.0003	0.00374211		0.0016	0.0316		0.0034	0.0503625		0.2568	0.382777
2-ketoisocaproic acid		2961.5	743-56406		2939	1513-11266		3691.5	2378-24155		0.6013	0.716121			2-ketoisocaproic acid		4318.5	2131-9289		2961.5	743-56406		2939	1513-11266		3691.5	2378-24155		0.1599	0.222919		0.3488	0.533326		0.8606	0.914629		0.6501	0.733684
2-ketobutyric acid		2475.5a	1138-4792		2911a,b	1865-5931		3272b	1868-7586		0.0456	0.146043			2-ketobutyric acid		5123.5	2603-7669		2475.5a	1138-4792		2911a,b	1865-5931		3272b	1868-7586		0.0013	0.00628776		0.0118	0.0823575		0.061	0.187753		0.1988	0.3318
2-hydroxyhexanoic acid		6181a	683-29398		13282b	2947-63279		8373a,b	2008-49417		0.0063	0.0612931			2-hydroxyhexanoic acid		6542.5	1944-39656		6181a	683-29398		13282b	2947-63279		8373a,b	2008-49417		0.3488	0.423926		0.1781	0.360767		0.5982	0.727043		0.0588	0.162042
2-hydroxyglutaric acid		578	86-2442		509	286-1205		678	321-1128		0.7103	0.801624			2-hydroxyglutaric acid		747.5	366-2355		578	86-2442		509	286-1205		678	321-1128		0.2659	0.331675		0.0139	0.0823575		0.2416	0.44387		0.5967	0.693225
2-hydroxybutanoic acid		18493	1649-145825		34779	10056-206259		23082.5	1314-98293		0.2223	0.35598			2-hydroxybutanoic acid		13183	2644-100888		18493	1649-145825		34779	10056-206259		23082.5	1314-98293		0.9068	0.934398		0.0695	0.222588		0.1781	0.370261		0.1988	0.3318
2-deoxytetronic acid		773.5a	208-2758		2819b	1243-6876		2850.5b	380-7032		0.0063	0.0612931			2-deoxytetronic acid		5218	1599-11617		773.5a	208-2758		2819b	1243-6876		2850.5b	380-7032		0.0007	0.00474		0.2416	0.433782		0.1011	0.239607		0.0025	0.0962812
2'-deoxyguanosine		349.5a	125-2631		1095.5a,b	421-3514		1080b	807-4941		0.0115	0.0757083			2'-deoxyguanosine		1373	595-10798		349.5a	125-2631		1095.5a,b	421-3514		1080b	807-4941		0.0023	0.00879194		0.1353	0.320661		0.4124	0.592356		0.0233	0.120046
2-aminobutyric acid		32153	13109-195391		55466	26342-236922		69418.5	37592-265531		0.6013	0.716121			2-aminobutyric acid		93250	42814-199254		32153	13109-195391		55466	26342-236922		69418.5	37592-265531		0.0404	0.0674282		0.0895	0.24104		0.1011	0.239607		0.2568	0.382777
2,6-diaminopimelic acid		332	181-927		314	187-732		396	263-1633		0.1873	0.319353			2,6-diaminopimelic acid		721	553-1340		332	181-927		314	187-732		396	263-1633		0.0192	0.0392276		0.0002	0.0158		0.0084	0.079632		0.5967	0.693225
2,5-dihydroxypyrazine NIST		1136.5	256-2064		1182	654-9292		1533.5	525-9213		0.0665	0.17131			2,5-dihydroxypyrazine NIST		3310	1834-6780		1136.5	256-2064		1182	654-9292		1533.5	525-9213		0.0001	0.0029625		0.0533	0.185766		0.0533	0.183074		0.1509	0.286106
2,4-diaminobutyric acid		1276.5a	335-3201		3767.5a,b	678-18229		3620.5b	946-13562		0.0034	0.05372			2,4-diaminobutyric acid		4403	501-13743		1276.5a	335-3201		3767.5a,b	678-18229		3620.5b	946-13562		0.0013	0.00628776		0.9068	0.938479		1	1		0.0191	0.119124
1-monostearin		2274	738-3209		1755.5	1026-27834		2903	825-10879		0.7103	0.801624			1-monostearin		3197.5	1264-44748		2274	738-3209		1755.5	1026-27834		2903	825-10879		0.0261	0.0472191		0.2659	0.459988		0.1977	0.400469		0.7624	0.795986
1-monopalmitin		2874.5	648-7503		4301.5	386-12661		3591.5	237-6671		0.1352	0.273867			1-monopalmitin		10698	2138-99531		2874.5	648-7503		4301.5	386-12661		3591.5	237-6671		0.0016	0.007584		0.0164	0.0844957		0.0028	0.0503625		0.3258	0.454204
1-monoolein		7149.5	1022-53662		15568	8135-89327		25257	4060-68859		0.3159	0.453747			1-monoolein		63367.5	5518-770825		7149.5	1022-53662		15568	8135-89327		25257	4060-68859		0.0023	0.00879194		0.01	0.0764516		0.0139	0.0915083		0.0963	0.219453
1-methylhydantoin		17797	1309-126054		7407	2344-40861		10404.5	3577-132210		0.1873	0.319353			1-methylhydantoin		37958	4320-277877		17797	1309-126054		7407	2344-40861		10404.5	3577-132210		0.1599	0.222919		0.0118	0.0823575		0.1139	0.257089		0.7624	0.795986
1,5-anhydroglucitol		1293.5	183-4612		1986.5	374-21466		2350	574-38683		0.3159	0.453747			1,5-anhydroglucitol		2419.5	500-101156		1293.5	183-4612		1986.5	374-21466		2350	574-38683		0.0895	0.133406		0.6395	0.761616		0.5982	0.727043		0.4497	0.566909
1,2,4-benzenetriol		374	99-5231		650.5	443-1681		905.5	390-1711		0.2223	0.35598			1,2,4-benzenetriol		2023.5	463-5543		374	99-5231		650.5	443-1681		905.5	390-1711		0.0019	0.00818727		0.0016	0.0316		0.0224	0.106176		0.0493	0.1482

## Sheet: Metronidazole group
S2 Table. Untargeted metabolomics in dogs with acute diarrhea (pre metronidazole, day 0), and on days 7 and 28 and compared to healthy control dogs (HC). Metronidazole was administeres for 7 days 15 mg/kg p.o. q12. Columns not sharing a common superscript are significantly different from each other (p<0.05) within groups
Metabolite		Day 0			Day 7			Day 28			Day 0 vs day 7			Day 0 vs Day 7 vs Day 28			Metabolite		HC			HC vs day 0			HC vs day 7			HC vs day 28
		Median	Range		Median	Range		Median	Range		P value	Q value		P value	Q value				Median	Range		P value	Q value		P value	Q value		P value	Q value
zymosterol		3049.5	1885-5164		4961.5	1694-9123		6963.5	2138-13003		0.5653	0.752772		0.3046	0.357977		zymosterol		7636.5	175-29324		0.0112	0.0286588		0.044	0.0863459		0.3321	0.461054
xylulose		3884.5	849-49359		5054.5	1260-38707		6885.5	616-20327		0.7494	0.861645		0.964	0.978649		xylulose		28326.5	3702-106529		0.1357	0.198976		0.0112	0.0336		0.009	0.0427091
xylose		88904	4909-1694976		34938.5	14078-1478210		78682	11396-218133		0.3379	0.616727		0.6197	0.692433		xylose		897900	135741-3768878		0.1007	0.16026		0.0036	0.0154033		0.001	0.01305
xylonic acid		308.5	74-872		413.5	125-2068		471	135-1496		0.4822	0.719167		0.7682	0.692433		xylonic acid		513.5	99-2357		0.3706	0.451993		0.8229	0.87664		0.9405	0.944117
xylitol		1148.5	870-5355		3333	241-8196		2060.5	871-142726		0.5653	0.752772		0.6197	0.692433		xylitol		2992	1313-6464		0.1793	0.246302		0.8229	0.87664		0.0622	0.135285
xanthurenic acid		1586	342-33406		6775.5	131-21481		5108.5	64-26326		0.5653	0.752772		0.964	0.874735		xanthurenic acid		730.5	95-3953		0.1793	0.246302		0.0305	0.068625		0.1007	0.191845
xanthosine		375.5	47-617		148.5	97-286		315.5	201-489		0.2774	0.57009		0.1916	0.322079		xanthosine		801.5	73-2413		0.0138	0.0336617		0.0028	0.0123864		0.0138	0.0537582
xanthine		27518.5	537-50451		11071	7015-31983		23475	10064-37183		0.7494	0.861645		0.4861	0.480072		xanthine		56154	8245-80588		0.0367	0.0742535		0.0207	0.050025		0.1172	0.21391
vanillic acid		485.5	192-1189		913	217-3740		532.5	203-1452		0.1797	0.450978		0.1118	0.446159		vanillic acid		2583	1035-30618		0.0006	0.00711818		0.0305	0.068625		0.0005	0.01305
valine		1251499a	582384-1634672		680856b	512924-1066852		877934a,b	472732-1721667		0.0181	0.248637		0.0084	0.185468		valine		524984	138860-1043060		0.0013	0.00892895		0.0524	0.100562		0.009	0.0427091
urocanic acid		2567.5	1127-7070		3097.5	944-4873		2721	1217-4648		0.848	0.892452		0.964	0.978649		urocanic acid		2445	960-6408		0.8814	0.902139		0.7654	0.828919		1	1
uridine		2542	847-11659		3469.5	763-26857		3398	637-7331		0.1797	0.450978		0.4861	0.874735		uridine		2960	931-11200		0.5019	0.582204		0.4118	0.532078		0.6015	0.716856
uric acid		2301	428-31247		1519	454-15843		1710	694-2959		0.9491	0.9491		0.964	0.874735		uric acid		10250	629-87791		0.0524	0.0956392		0.0058	0.0219391		0.0017	0.0153
urea		19592	8043-97413		42847	19498-750182		26575	12687-50908		0.1797	0.450978		0.1118	0.185468		urea		44732	18879-258486		0.0862	0.143301		0.9405	0.955138		0.0367	0.0967545
uracil		69105.5	13228-123857		30318	19788-72441		63005.5	25376-439102		0.3379	0.616727		0.1916	0.322079		uracil		299892	213051-890938		0.0003	0.00711818		0.0003	0.00711818		0.0072	0.038351
UDP-glucuronic acid		2567	1033-32361		8625.5	1398-38715		2843	1802-49513		0.3379	0.616727		0.1916	0.54549		UDP-glucuronic acid		4286	1441-46847		0.1172	0.179936		0.8814	0.920182		0.1172	0.21391
tyrosol		1243	358-1968		1392.5	848-24259		2138	649-3179		0.3379	0.616727		0.7682	0.692433		tyrosol		7014.5	2376-12620		0.0003	0.00711818		0.009	0.0305065		0.0013	0.01305
tyrosine		682694.5a	440361-846609		105383.5b	28242-653293		478356.5a,b	119182-872592		0.006	0.1566		0.0272	0.112343		tyrosine		313369	168391-873978		0.017	0.0385826		0.044	0.0863459		0.7654	0.822096
tyramine		536442	71929-752648		901219	171928-1209393		403386	84281-1343144		0.2248	0.501477		0.1118	0.254233		tyramine		265827	64349-467896		0.0524	0.0956392		0.017	0.04437		0.1172	0.21391
tryptophan		192818	129842-360090		134029	62229-177191		126683	57203-246670		0.0476	0.335773		0.0854	0.480072		tryptophan		125566	33420-536887		0.1563	0.221708		1	1		0.8229	0.859108
triethanolamine		336.5a	99-1297		527.5b	176-1594		654.5b	292-3885		0.0639	0.347456		0.0207	0.155065		triethanolamine		904	352-1904		0.0112	0.0286588		0.2326	0.333564		0.7091	0.787554
trehalose		1442	86-30972		3365	1209-37583		7515	191-43328		0.3379	0.616727		0.4861	0.480072		trehalose		4152.5	479-97076		0.4556	0.540507		1	1		0.8814	0.905691
trans-4-hydroxyproline		36542.5	16072-56965		44694.5	20104-70435		45400.5	12307-158689		0.2774	0.57009		0.4861	0.874735		trans-4-hydroxyproline		29042	16277-153410		0.9405	0.944117		0.1793	0.26895		0.1563	0.277512
tocopherol gamma-		1719	222-4970		5061.5	989-263190		6513	1736-23413		0.1102	0.394003		0.0854	0.16589		tocopherol gamma-		5422	1456-43777		0.0305	0.063684		0.7654	0.828919		0.8229	0.859108
tocopherol delta-		966a	114-4515		2698a,b	669-105668		4078b	1041-23285		0.1797	0.450978		0.0272	0.119792		tocopherol delta-		3843.5	461-36104		0.1357	0.198976		0.8814	0.920182		0.6015	0.716856
tocopherol beta		84.5	34-400		253.5	11-6479		251	98-581		0.0845	0.386921		0.4861	0.480072		tocopherol beta		773	139-4788		0.0036	0.0134229		0.5506	0.650256		0.0207	0.0667
tocopherol alpha-		3684.5	477-57777		11297	359-68789		8488.5	627-100010		0.4822	0.719167		0.7682	0.692433		tocopherol alpha-		65236	14372-412938		0.0013	0.00892895		0.0072	0.0264676		0.017	0.0583816
thymine		33760	9981-69290		19728.5	12001-61381		30494.5	8823-88394		0.7494	0.861645		0.4861	0.54549		thymine		85232.5	49465-182427		0.0008	0.00745714		0.0005	0.00711818		0.009	0.0427091
thymidine		6905.5	2843-20043		5860.5	2618-12600		11555	3397-15673		0.4062	0.671001		0.1916	0.322079		thymidine		10213	2849-26566		0.5506	0.63587		0.1172	0.188822		0.7654	0.822096
threonine		112112	77502-182772		73771	42278-335854		86161.5	51437-162990		0.0127	0.207169		0.0515	0.322079		threonine		33400	12218-107017		0.0013	0.00892895		0.0734	0.128573		0.0058	0.0329087
threonic acid		831	282-4595		1199.5	514-5397		908	506-1619		0.848	0.892452		0.964	0.978649		threonic acid		2650.5	743-10134		0.017	0.0385826		0.0112	0.0336		0.0022	0.0174
threitol		1281	373-6297		3078	1488-5174		3995	2244-5677		0.0639	0.347456		0.0515	0.119792		threitol		4319	233-14066		0.1172	0.179936		0.5506	0.650256		0.7654	0.822096
taurine		4762	6-312097		27439.5	8660-176762		6068	36-11337		0.1102	0.394003		0.2366	0.446159		taurine		87.5	15-30535		0.1171	0.179936		0.0006	0.00711818		0.0169	0.0583816
tagatose		568.5	266-1480		1299.5	323-3626		747.5	268-2492		0.1797	0.450978		0.4861	0.54549		tagatose		871	481-3293		0.0622	0.109691		0.8814	0.920182		0.2963	0.432035
syringic acid		56053.5	34039-100771		39388.5	6533-120377		68449.5	28034-161902		0.4822	0.719167		0.6197	0.692433		syringic acid		73409	9917-236543		0.6015	0.682572		0.3706	0.483633		0.7654	0.822096
sulfurol		20164a	14112-137287		12932.5b	7026-64345		17484a,b	10242-29879		0.0253	0.253973		0.0272	0.119792		sulfurol		16007	2612-92461		0.2326	0.305068		0.5019	0.61213		0.2631	0.396931
sucrose		509	336-21858		1710	472-2876		1089	153-3014		0.5653	0.752772		0.6197	0.874735		sucrose		2054.5	338-4772		0.6015	0.682572		0.7654	0.828919		0.0207	0.0667
succinic acid		225651.5a	63807-925640		283171.5b	7064-1116735		720561.5a	8544-1552217		0.4062	0.671001		0.0012	0.1044		succinic acid		8125.5	4075-1601440		0.0017	0.00944043		0.0017	0.0100841		0.0017	0.0153
squalene		971.5	277-2583		1256.5	464-3110		1573.5	444-2976		0.4822	0.719167		0.3046	0.692433		squalene		3239	567-6634		0.0072	0.0213545		0.0138	0.04002		0.1172	0.21391
spermidine		1216	48-3099		611.5	256-1659		579.5	131-2501		0.4822	0.719167		0.4861	0.480072		spermidine		9594.5	93-78717		0.0138	0.0336617		0.0112	0.0336		0.017	0.0583816
sorbitol		8900	2744-31681		7195	3362-46337		8364	2057-129527		0.7494	0.861645		0.4861	0.786969		sorbitol		7979	2495-37086		0.7654	0.812071		0.6544	0.73304		0.7654	0.822096
sophorose		296.5	69-2199		634.5	81-2181		535.5	124-5854		0.4062	0.671001		0.6197	0.874735		sophorose		275	35-1944		0.8229	0.859108		0.1563	0.239966		0.2047	0.329794
sinapinic acid		335.5	108-743		705	321-2152		544	228-1082		0.035	0.3045		0.1118	0.254233		sinapinic acid		1213.5	456-5336		0.0006	0.00711818		0.4118	0.532078		0.0046	0.0272864
shikimic acid		4632	1535-17638		5952.5	3611-15064		6459	2737-7995		0.3379	0.616727		0.964	0.9999		shikimic acid		8300.5	2849-21790		0.009	0.0249894		0.0252	0.0592541		0.0305	0.0855968
serine		132398	65431-435706		130442	76744-563448		147639	59834-255403		0.3379	0.616727		0.4861	0.874735		serine		88283	43739-222010		0.0524	0.0956392		0.2963	0.402783		0.0305	0.0855968
salicylic acid		1022	823-5085		1693	969-5148		2033	628-4602		0.1417	0.430043		0.4861	0.446159		salicylic acid		3962	797-29246		0.0112	0.0286588		0.0112	0.0336		0.0367	0.0967545
ribose		25770.5	9270-141873		29419	11872-95567		55927	11331-78238		0.848	0.892452		0.9999	0.978649		ribose		93315.5	26474-582647		0.0252	0.05481		0.0207	0.050025		0.0207	0.0667
ribonic acid		814.5a	363-13090		3807b	899-30262		6479b	1853-14569		0.1417	0.430043		0.0207	0.1044		ribonic acid		3538.5	918-16242		0.1172	0.179936		0.7654	0.828919		0.1007	0.191845
raffinose		299.5	48-149734		1591.5	343-22522		645.5	67-9046		0.0639	0.347456		0.3046	0.357977		raffinose		542.5	52-3896		0.2963	0.370021		0.2631	0.367214		0.9405	0.944117
quinic acid		1662	91-15235		6287.5	1064-69284		9471	621-45414		0.3379	0.616727		0.4861	0.446159		quinic acid		2153.5	309-18549		0.7091	0.771146		0.2631	0.367214		0.5019	0.626775
pyruvic acid		5669.5	645-11273		23648	1388-55460		7767.5	1713-17285		0.0639	0.347456		0.4861	0.446159		pyruvic acid		6756	3147-16062		0.7654	0.812071		0.0367	0.0772476		0.5019	0.626775
pyrrole-2-carboxylic acid		2560	1121-4420		1840	646-2783		3146.5	1122-4621		0.1417	0.430043		0.1916	0.254233		pyrrole-2-carboxylic acid		6806.5	2965-13433		0.0013	0.00892895		0.0003	0.00711818		0.0022	0.0174
putrescine		102876	18384-868800		190736	24920-790800		149309	64374-590256		0.2774	0.57009		0.0515	0.446159		putrescine		238364	72415-1188032		0.1563	0.221708		0.6544	0.73304		0.2631	0.396931
pseudo uridine		2210a	951-6018		2749a,b	1047-6140		4758b	1602-17128		0.7494	0.861645		0.0084	0.155065		pseudo uridine		8866.5	1764-25248		0.0017	0.00944043		0.0022	0.0112588		0.0524	0.12103
proline		363294	93882-1197165		180083	91685-405051		231515	32438-552940		0.0476	0.335773		0.0854	0.322079		proline		96193.5	27422-380435		0.0046	0.0162243		0.1563	0.239966		0.1007	0.191845
piperidone		3572	184-59482		4306	1783-14071		6943	3616-15782		0.848	0.892452		0.964	0.978649		piperidone		8775	1131-36189		0.2963	0.370021		0.2047	0.30015		0.2963	0.432035
pipecolinic acid		2627	359-15743		3142	973-6236		6466.5	2433-16536		0.7494	0.861645		0.0854	0.16589		pipecolinic acid		19075	1934-86765		0.0112	0.0286588		0.017	0.04437		0.3321	0.461054
pinitol		1077a	227-21807		6093b	921-579234		6957b	2081-149762		0.1797	0.450978		0.0207	0.1044		pinitol		1282	334-50021		0.7091	0.771146		0.0207	0.050025		0.0058	0.0329087
pimelic acid		348a	225-1604		895.5b	513-1502		1641.5b	927-2715		0.0639	0.347456		0.0012	0.155065		pimelic acid		2071.5	588-6110		0.0006	0.00711818		0.0028	0.0123864		0.3321	0.461054
phytosphingosine		12673	1243-183105		8278	5458-33584		10483.5	3238-61379		0.5653	0.752772		0.4861	0.54549		phytosphingosine		31074.5	5524-202665		0.2963	0.370021		0.0367	0.0772476		0.0734	0.153259
p-hydroxylphenyllactic acid		906.5a	355-1887		2914b	121-12818		4285.5a,b	917-10163		0.0017	0.11745		0.0162	0.16589		p-hydroxylphenyllactic acid		1851.5	758-16692		0.017	0.0385826		0.2326	0.333564		0.4556	0.5916
phosphoethanolamine		144	49-370		139.5	33-242		173.5	59-679		0.7494	0.861645		0.4861	0.446159		phosphoethanolamine		910	494-2236		0.0003	0.00711818		0.0003	0.00711818		0.001	0.01305
phosphate		4912	1059-26321		8194	2901-38480		4515	1487-91037		0.2774	0.57009		0.4861	0.480072		phosphate		14620	4116-37957		0.0072	0.0213545		0.2963	0.402783		0.044	0.10834
phenylethylamine		12155.5	647-34004		11762	1444-46420		5415	1871-91856		0.4822	0.719167		0.3046	0.692433		phenylethylamine		2609.5	1287-33917		0.8229	0.859108		0.0734	0.128573		0.0734	0.153259
phenylalanine		558666.5a	269638-624165		307477b	245933-402312		310509.5a,b	142445-591694		0.0127	0.207169		0.0162	0.1044		phenylalanine		193922	44641-767261		0.0305	0.063684		0.5019	0.61213		0.2963	0.432035
phenylacetic acid		3838.5	761-42008		2720.5	1507-28979		18042	1881-52580		0.5653	0.752772		0.1916	0.480072		phenylacetic acid		31136.5	1303-275776		0.0046	0.0162243		0.0305	0.068625		0.1007	0.191845
phenol		3131.5	1426-11129		15215.5	6542-32572		8552.5	5880-16943		0.0088	0.176677		0.0515	0.119792		phenol		14656.5	6234-30944		0.0008	0.00745714		0.6015	0.688559		0.0207	0.0667
pentose		13656	2830-272550		11805.5	7767-224982		19986	5525-52717		0.7494	0.861645		0.7682	0.692433		pentose		133332	28272-631916		0.0734	0.12687		0.0046	0.0184708		0.0006	0.01305
pentitol		559.5	150-6160		1359	358-15217		906	315-1732		0.1102	0.394003		0.0854	0.254233		pentitol		1053	315-6606		0.1563	0.221708		0.3321	0.446794		0.6276	0.741193
pentadecanoic acid		13358	6671-32862		15233.5	8703-28950		19752.5	10876-30666		0.4062	0.671001		0.0854	0.446159		pentadecanoic acid		56753	39703-128770		0.0003	0.00711818		0.0003	0.00711818		0.0003	0.01305
parabanic acid		3552a	1339-6316		5685.5a,b	2400-8330		8626b	4971-10372		0.1417	0.430043		0.0036	0.0335571		parabanic acid		8254	2116-15763		0.0036	0.0134229		0.0367	0.0772476		0.6544	0.742602
pantothenic acid		3299	641-22294		3216.5	1100-14804		3224.5	1552-40763		0.848	0.892452		0.4861	0.480072		pantothenic acid		12114.5	4995-67527		0.009	0.0249894		0.0022	0.0112588		0.0138	0.0537582
panose		699	45-3684		2554	439-4678		1699	159-18512		0.1102	0.394003		0.1916	0.322079		panose		1309.5	255-17739		0.1357	0.198976		0.9405	0.955138		0.6544	0.742602
palmitoleic acid		1210.5	440-14532		722.5	230-7173		875	624-8019		0.5653	0.752772		0.7682	0.692433		palmitoleic acid		9663	3736-40660		0.0036	0.0134229		0.0013	0.00917027		0.0013	0.01305
palatinitol		805.5	119-56632		2547	310-21512		1085.5	108-217187		0.1797	0.450978		0.964	0.978649		palatinitol		454.5	182-30326		0.9405	0.944117		0.0734	0.128573		0.8229	0.859108
oxoproline		608190	216908-1331465		914116	435309-1312255		366814	228696-1191318		0.1417	0.430043		0.4861	0.54549		oxoproline		258588	138127-797965		0.017	0.0385826		0.0006	0.00711818		0.0305	0.0855968
oxamic acid		1024a	368-3003		1868a,b	796-2636		2546.5b	860-5392		0.5653	0.752772		0.0084	0.0522		oxamic acid		1473.5	691-6898		0.4118	0.499906		0.5506	0.650256		0.0524	0.12103
orotic acid		1098	224-2665		1160.5	506-2248		1889.5	652-3850		0.4817	0.719167		0.0854	0.480072		orotic acid		669.5	234-3833		0.9405	0.944117		0.3705	0.483633		0.044	0.10834
ornithine		107565	62228-474677		173742	81473-382466		121482	31234-315396		0.1797	0.450978		0.6197	0.874735		ornithine		67469	41134-376616		0.2047	0.271202		0.0367	0.0772476		0.3321	0.461054
oleic acid		3431.5	1273-149295		2432	1858-62787		10765	4713-21835		0.848	0.892452		0.2366	0.446159		oleic acid		13996	6483-224418		0.0072	0.0213545		0.0046	0.0184708		0.0862	0.177151
oleamide		7039	2664-17328		10898	633-20661		10014.5	2716-14507		0.9491	0.9491		0.964	0.978649		oleamide		3637.5	1721-8985		0.0622	0.109691		0.1007	0.167406		0.044	0.10834
octadecylglycerol		18434.5	8661-42135		12650	5307-28132		16894	7382-62932		0.6547	0.821523		0.3046	0.692433		octadecylglycerol		28547	8905-119884		0.044	0.0857015		0.017	0.04437		0.3706	0.503784
octadecanol		553a	327-965		694.5a,b	267-993		1169b	525-1416		0.4822	0.719167		0.0036	0.0522		octadecanol		1610.5	742-4337		0.0005	0.00711818		0.0006	0.00711818		0.0931	0.189837
O-acetylserine		433.5	80-1172		594.5	304-3124		684	66-4076		0.1417	0.430043		0.4861	0.786969		O-acetylserine		914.5	327-3151		0.0367	0.0742535		0.6015	0.688559		0.8229	0.859108
norvaline		10527.5	699-69037		12565	1847-172466		16482.5	10832-211722		0.6547	0.821523		0.6197	0.54549		norvaline		10772.5	3979-100881		0.6015	0.682572		0.8229	0.87664		0.2963	0.432035
nonadecanoic acid		1745.5	742-8620		2466.5	1124-30466		3176	1770-5722		0.2248	0.501477		0.0854	0.16589		nonadecanoic acid		2397	1416-5623		0.2631	0.336613		0.9405	0.955138		0.6015	0.716856
nicotinic acid		24858.5	4810-72818		24852	10335-68031		46608.5	26901-123543		0.6547	0.821523		0.0854	0.16589		nicotinic acid		69479.5	38834-230671		0.0046	0.0162243		0.0022	0.0112588		0.0138	0.0537582
nicotinamide		733.5a	185-1477		2262b	1442-3251		1591a,b	992-5520		0.0027	0.11745		0.0003	0.0261		nicotinamide		2104.5	591-20254		0.0013	0.00892895		0.6544	0.73304		0.1007	0.191845
nicotianamine		388a,b	166-4612		2212a	253-14857		331b	203-8466		0.0181	0.248637		0.0162	0.119792		nicotianamine		793	169-23250		0.2047	0.271202		0.3706	0.483633		0.2326	0.363525
n-epsilon-trimethyllysine		947.5	409-2306		1056	271-3864		1564.5	491-3389		0.7494	0.861645		0.964	0.978649		n-epsilon-trimethyllysine		1132.5	897-3232		0.1007	0.16026		0.4556	0.568955		0.7091	0.787554
N-acetylputrescine		5868	1114-14455		8944.5	1561-31447		6778	3447-17141		0.4062	0.671001		0.964	0.9999		N-acetylputrescine		10537.5	2611-36176		0.0622	0.109691		0.4556	0.568955		0.2047	0.329794
N-acetylornithine		2152.5	526-4864		651.5	463-3378		1546.5	587-4604		0.0845	0.386921		0.3046	0.446159		N-acetylornithine		6013	1800-20089		0.009	0.0249894		0.0008	0.0072		0.001	0.01305
N-acetylglutamate		606	224-2529		1094.5	495-1574		716.5	314-2708		0.1102	0.394003		0.3046	0.692433		N-acetylglutamate		738.5	30-1803		0.5019	0.582204		0.0734	0.128573		0.9405	0.944117
N-acetyl-D-mannosamine		31817	11975-202942		27209	1376-100995		20889	6486-62037		0.5653	0.752772		0.6197	0.874735		N-acetyl-D-mannosamine		7964.5	1543-21105		0.0017	0.00944043		0.2047	0.30015		0.017	0.0583816
N-acetyl-D-galactosamine		20874.5	1271-48896		18652.5	85-75275		22004.5	2960-94693		0.5653	0.752772		0.964	0.978649		N-acetyl-D-galactosamine		9757.5	2047-22102		0.0734	0.12687		0.0862	0.147047		0.017	0.0583816
N-acetylaspartic acid		4962.5	619-45190		2086.5	939-33159		9218	1214-17171		0.5653	0.752772		0.6197	0.874735		N-acetylaspartic acid		16257	3106-69740		0.0305	0.063684		0.0058	0.0219391		0.0367	0.0967545
myristic acid		2485	1031-5889		3408	1565-17708		5719.5	2584-7897		0.4062	0.671001		0.0515	0.185468		myristic acid		14447.5	4404-110389		0.0005	0.00711818		0.0005	0.00711818		0.0013	0.01305
myo-inositol		23507.5	2799-198522		21751.5	4568-351896		21615.5	2976-223747		0.7494	0.861645		0.7682	0.978649		myo-inositol		11034.5	5532-25580		0.2047	0.271202		0.9405	0.955138		0.2047	0.329794
mucic acid		47	21-4601		93	20-2249		172.5	33-1813		0.9491	0.9491		0.7682	0.692433		mucic acid		236.5	45-1005		0.0524	0.0956392		0.0305	0.068625		0.5019	0.626775
montanic acid		2840	595-4505		2424.5	904-7256		4358	1197-10780		0.4062	0.671001		0.1118	0.254233		montanic acid		9003.5	2800-19989		0.0036	0.0134229		0.0017	0.0100841		0.0138	0.0537582
monomyristin		196.5	63-737		241	83-535		459.5	208-832		0.848	0.892452		0.0854	0.16589		monomyristin		1573.5	513-6861		0.0005	0.00711818		0.0005	0.00711818		0.0013	0.01305
methionine sulfoxide		26315.5	7153-52156		24093.5	12289-36392		34923.5	22740-49380		0.2248	0.501477		0.4861	0.874735		methionine sulfoxide		35528	11835-60544		0.8814	0.902139		0.044	0.0863459		0.7654	0.822096
methionine		166292	118003-237006		119349	99598-199949		186274	77732-213986		0.0639	0.347456		0.2366	0.322079		methionine		44889	3202-158199		0.0006	0.00711818		0.009	0.0305065		0.0013	0.01305
melezitose		61a	16-3356		1483b	87-13385		187.5a,b	45-25323		0.0181	0.248637		0.0036	0.0522		melezitose		197	78-1178		0.0138	0.0336617		0.1793	0.26895		0.6544	0.742602
mannonic acid		207	94-2253		504.5	141-1451		464.5	104-933		0.2248	0.501477		0.7682	0.692433		mannonic acid		439	66-648		0.4553	0.540507		0.2631	0.367214		0.8229	0.859108
maltotriose		247.5	35-6838		1104	248-7697		1839	114-8562		0.3706	0.671001		0.3046	0.357977		maltotriose		1704.5	58-32866		0.3321	0.408859		0.6015	0.688559		0.8814	0.905691
maltotriitol		48a	4-257		227b	45-3481		201.5b	64-2743		0.035	0.3045		0.0207	0.1044		maltotriitol		163	62-557		0.009	0.0249894		0.6544	0.73304		0.7654	0.822096
maltose		14731.5	2596-130640		15157	6992-152930		34210	1165-176492		0.848	0.892452		0.6197	0.692433		maltose		18163	3205-403989		0.8229	0.859108		0.4556	0.568955		0.9405	0.944117
malonic acid		281.5	68-1796		352	133-1483		639.5	151-1488		0.4822	0.719167		0.0854	0.155065		malonic acid		531	220-1570		0.0524	0.0956392		0.1172	0.188822		0.6544	0.742602
malic acid		5157	2137-13313		3806	758-12685		10126.5	704-15698		0.9491	0.9491		0.2366	0.446159		malic acid		2785.5	1371-9217		0.8814	0.902139		0.5506	0.650256		0.0367	0.0967545
maleimide		16086	6383-35724		31057	7927-57663		30707	8405-68224		0.2774	0.57009		0.0854	0.155065		maleimide		22762	10123-66321		0.1007	0.16026		0.6015	0.688559		0.5019	0.626775
maleic acid		544.5	290-1406		438.5	249-787		517.5	317-811		0.2248	0.501477		0.7682	0.978649		maleic acid		613	270-1275		0.7091	0.771146		0.0622	0.115959		0.6544	0.742602
lyxitol		4149	1742-29653		10286.5	2761-79916		8474	3528-13652		0.2774	0.57009		0.3046	0.357977		lyxitol		8532.5	5211-17530		0.2047	0.271202		1	1		0.3706	0.503784
lysine		486236	190150-635253		1023964	192616-1342978		463966	298161-1469282		0.0639	0.347456		0.2366	0.446159		lysine		216657	83844-494440		0.009	0.0249894		0.0022	0.0112588		0.0036	0.0229171
lithocholic acid		696.5	136-42606		834.5	118-1352		1412	600-10778		0.5653	0.752772		0.964	0.874735		lithocholic acid		64227.5	2210-119740		0.0022	0.0097322		0.0003	0.00711818		0.0005	0.01305
linolenic acid		9404.5	4955-104849		15738	3785-29102		12714.5	3578-44782		0.6547	0.821523		0.964	0.978649		linolenic acid		55643.5	19336-144848		0.0058	0.0189225		0.0017	0.0100841		0.0036	0.0229171
linoleic acid		9801	2547-98565		15259.5	5365-31314		14760	3418-37959		0.3379	0.616727		0.2366	0.446159		linoleic acid		58784	17672-221332		0.0028	0.0114188		0.001	0.00815625		0.001	0.01305
levoinositol		597.5a	101-1936		1275.5b	402-2738		1255a,b	43-2142		0.1417	0.430043		0.0272	0.119792		levoinositol		648.5	167-1544		0.8814	0.902139		0.044	0.0863459		0.0734	0.153259
levoglucosan		1460.5	748-12558		2277	922-13350		2466	1146-162657		0.2248	0.501477		0.4861	0.446159		levoglucosan		3451.5	468-8071		0.2047	0.271202		0.5019	0.61213		0.3321	0.461054
leucine		1705357.5a	1090783-2497423		993959b	793457-1461625		1298387a,b	549323-3032301		0.004	0.1305		0.0162	0.254233		leucine		726080	86866-1663544		0.001	0.00815625		0.0734	0.128573		0.017	0.0583816
lanosterol		832.5	359-6929		1605.5	390-8113		2037	747-3354		0.5653	0.752772		0.1916	0.254233		lanosterol		1780.5	544-14051		0.0931	0.153792		0.2631	0.367214		0.6544	0.742602
lactulose		4795.5	555-16410		6704	2875-47191		6162	1575-23786		0.1102	0.394003		0.4861	0.786969		lactulose		12735.5	1589-51728		0.2047	0.271202		0.9405	0.955138		0.1007	0.191845
lactose		727.5	327-5323		531	78-9891		958	292-8393		0.3379	0.616727		0.7682	0.786969		lactose		1474	226-8470		0.7654	0.812071		0.2963	0.402783		0.2963	0.432035
lactitol		1174	404-26654		897.5	220-23172		1439	124-13378		0.1797	0.450978		0.2366	0.692433		lactitol		7063	716-29190		0.0524	0.0956392		0.0207	0.050025		0.0252	0.0764791
lactic acid		34438	13181-871590		691800	88760-2953203		216042	38902-623902		0.035	0.3045		0.0515	0.119792		lactic acid		90034	21514-405509		0.2326	0.305068		0.0028	0.0123864		0.2631	0.396931
lactamide		33.5	9-619		1064	105-3645		151	72-544		0.0253	0.253973		0.2215	0.322079		lactamide		173	33-942		0.086	0.143301		0.0622	0.115959		0.5506	0.674679
kynurenic acid		9140	2858-276442		82466.5	6313-253615		105368	2996-344089		0.1102	0.394003		0.1916	0.254233		kynurenic acid		3667	904-8082		0.0252	0.05481		0.0005	0.00711818		0.0036	0.0229171
isothreonic acid		1586.5	499-3281		2646.5	1108-8286		2408	974-5793		0.2774	0.57009		0.0854	0.155065		isothreonic acid		8149.5	1332-22485		0.0022	0.0097322		0.017	0.04437		0.0072	0.038351
isopentadecanoic acid		30118	14706-104306		50547	27541-61898		43409	9692-77631		0.3379	0.616727		0.4861	0.480072		isopentadecanoic acid		136554	51231-274412		0.0017	0.00944043		0.0028	0.0123864		0.001	0.01305
isomaltose		972.5	296-187866		8814	1728-63339		3089	320-699895		0.0845	0.386921		0.2366	0.692433		isomaltose		830.5	132-107832		0.9405	0.944117		0.0112	0.0336		0.1172	0.21391
isolinoleic acid		3065.5	256-10072		7864	1738-17405		3580	1547-12392		0.0253	0.253973		0.1118	0.54549		isolinoleic acid		1652.5	302-22103		0.6015	0.682572		0.0305	0.068625		0.1793	0.303879
isoleucine		977821	440962-1489496		579704	365201-832524		714551	281482-1625620		0.0253	0.253973		0.0515	0.357977		isoleucine		382770	60820-949667		0.0022	0.0097322		0.1793	0.26895		0.0207	0.0667
isohexonic acid		149.5	42-1326		479	247-3003		248.5	215-790		0.0639	0.347456		0.0515	0.119792		isohexonic acid		461.5	140-2947		0.0524	0.0956392		0.7654	0.828919		0.2326	0.363525
isochlorogenic acid		52.5	5-361		153	31-1667		141.5	8-3288		0.3379	0.616727		0.1916	0.357977		isochlorogenic acid		214	35-395		0.0862	0.143301		0.3509	0.469666		0.2047	0.329794
inosine		2551.5	250-9055		497	256-2015		1269.5	880-3126		0.0845	0.386921		0.0515	0.119792		inosine		3418	1313-17995		0.6544	0.73304		0.0005	0.00711818		0.0046	0.0272864
indole-3-propionic acid		244376	157305-562201		175424	73265-270019		162385	82550-302579		0.0639	0.347456		0.0854	0.322079		indole-3-propionic acid		163198	35011-635131		0.0734	0.12687		0.7091	0.787554		0.7654	0.822096
indole-3-lactate		2303.5a	336-4548		19977b	668-48382		13690a,b	1721-43569		0.0027	0.11745		0.0084	0.155065		indole-3-lactate		34249.5	9235-202541		0.0003	0.00711818		0.2047	0.30015		0.0622	0.135285
indole-3-acetate		2143	506-4638		3613	227-31308		5607	2771-100172		0.1797	0.450978		0.4861	0.480072		indole-3-acetate		18789	3407-40516		0.0005	0.00711818		0.0367	0.0772476		0.0367	0.0967545
ile-ile		1703	381-5141		1225.5	340-2698		2097	1134-5534		0.848	0.892452		0.7682	0.692433		ile-ile		1621	338-4648		0.7654	0.812071		0.5506	0.650256		0.4556	0.5916
hypoxanthine		18406.5	3030-70548		15660	9200-37622		27446.5	10974-51665		0.7494	0.861645		0.2366	0.446159		hypoxanthine		38192.5	6879-81302		0.2631	0.336613		0.2047	0.30015		0.7091	0.787554
hydroxycarbamate		3255	2097-7340		5496.5	2260-6677		7970.5	4040-14866		0.4822	0.719167		0.1118	0.185468		hydroxycarbamate		18265	6648-33632		0.0003	0.00711818		0.0003	0.00711818		0.009	0.0427091
hydroquinone		741.5	105-7301		1538	877-6720		1756	898-2668		0.1797	0.450978		0.4861	0.446159		hydroquinone		4591	1943-16668		0.0058	0.0189225		0.009	0.0305065		0.0005	0.01305
homoserine		6835	3026-12324		6171	3842-14584		11701.5	5900-15310		0.2248	0.501477		0.0515	0.322079		homoserine		12194	9891-18799		0.0022	0.0097322		0.0003	0.00711818		0.1793	0.303879
homocystine		1498a	348-5387		2225.5b	685-13789		3332.5b	735-7244		0.1417	0.430043		0.0012	0.1044		homocystine		1565	296-9929		0.709	0.771146		0.1171	0.188822		0.332	0.461054
histidine		62094.5	21453-201762		60974.5	17954-113224		43966	19812-73777		0.9491	0.9491		0.3046	0.446159		histidine		23879.5	6939-49715		0.0072	0.0213545		0.0028	0.0123864		0.009	0.0427091
hexadecylglycerol		7868.5	3285-13891		7910	3483-30581		7952	3668-26178		0.5653	0.752772		0.4861	0.786969		hexadecylglycerol		11563.5	3801-37642		0.0862	0.143301		0.3706	0.483633		0.4118	0.548366
guanosine		1289.5	357-11925		525	263-1274		753	491-1442		0.0845	0.386921		0.0515	0.357977		guanosine		2432	963-16073		0.4556	0.540507		0.0006	0.00711818		0.0005	0.01305
guanine		3014.5	714-6725		2319	865-3798		2040	346-4962		0.0845	0.386921		0.0854	0.446159		guanine		4233.5	1644-11619		0.2631	0.336613		0.017	0.04437		0.0138	0.0537582
glycolic acid		13624.5	3368-33454		11562.5	8592-37124		28016.5	12455-83593		0.5653	0.752772		0.0854	0.16589		glycolic acid		50454.5	22979-100133		0.0022	0.0097322		0.0017	0.0100841		0.0622	0.135285
glycine		171132	82020-442672		304099	84040-606722		148176	52389-331210		0.5653	0.752772		0.6197	0.692433		glycine		107174	60466-257297		0.0367	0.0742535		0.0207	0.050025		0.2047	0.329794
glycerol-alpha-phosphate		1018a	460-8062		4767.5b	1716-12718		8572b	533-24818		0.1102	0.394003		0.0027	0.0358875		glycerol-alpha-phosphate		6099	1968-19058		0.044	0.0857015		0.1357	0.21336		0.8814	0.905691
glycerol-3-galactoside		3370.5	1094-11167		5846	2325-73274		4417	428-15767		0.1102	0.394003		0.0854	0.480072		glycerol-3-galactoside		3366.5	1478-38310		0.7091	0.771146		0.0622	0.115959		0.9405	0.944117
glycerol		139178	63738-343380		92171.5	22308-251082		122078	92652-183225		0.848	0.892452		0.7682	0.692433		glycerol		246242	100104-611481		0.0305	0.063684		0.0207	0.050025		0.009	0.0427091
glyceric acid		12459	8083-27453		13344.5	8860-20998		16821	7808-26185		0.6547	0.821523		0.964	0.9999		glyceric acid		38072.5	14178-105347		0.0022	0.0097322		0.0008	0.0072		0.0022	0.0174
glutaric acid		1323	260-2926		533	459-13865		1800.5	551-9117		0.7494	0.861645		0.0854	0.322079		glutaric acid		2773	1760-7884		0.0058	0.0189225		0.009	0.0305065		0.4118	0.548366
glutamine		91715	13940-236613		43554	8425-81067		44357.5	22024-112121		0.1102	0.394003		0.3046	0.446159		glutamine		22464	5905-50022		0.0046	0.0162243		0.1007	0.167406		0.0138	0.0537582
glutamate		120387.5a	62203-648970		498198.5b	164507-1234940		174976a,b	92915-1757334		0.0017	0.11745		0.0003	0.112343		glutamate		94925.5	37072-496286		0.4556	0.540507		0.0006	0.00711818		0.0622	0.135285
glucuronic acid		4080.5	1260-69780		11960.5	1887-174337		4019.5	2236-20535		0.1797	0.450978		0.0515	0.155065		glucuronic acid		2619.5	921-18104		0.3321	0.408859		0.0112	0.0336		0.2047	0.329794
glucose-1-phosphate		4088.5	728-33577		11670.5	5464-26107		6123	2950-38879		0.1417	0.430043		0.0854	0.155065		glucose-1-phosphate		7037	1861-18389		0.5019	0.582204		0.0622	0.115959		0.7091	0.787554
glucose		74342.5	15270-222782		138493	55305-498153		131414	9945-268547		0.2248	0.501477		0.6197	0.692433		glucose		66258	11201-170400		0.3706	0.451993		0.0367	0.0772476		0.1563	0.277512
gluconic acid		213	84-6573		585	346-2371		717.5	70-2120		0.0845	0.386921		0.3046	0.446159		gluconic acid		433.5	127-736		0.2792	0.355469		0.1172	0.188822		0.8229	0.859108
galacturonic acid		8617.5	1726-82607		10111	1153-34640		4287.5	1556-160943		0.848	0.892452		0.964	0.978649		galacturonic acid		9554	3174-51160		0.7654	0.812071		0.8814	0.920182		0.4556	0.5916
galactose		310548	48224-1047687		287686	22208-1134570		310996	29214-569396		0.9491	0.9491		0.4861	0.874735		galactose		342676	51598-831937		1	1		0.8229	0.87664		0.3321	0.461054
galactonic acid		1394	648-8308		1239	456-5292		2655	835-3464		0.2248	0.501477		0.4861	0.692433		galactonic acid		3392.5	1887-18998		0.0524	0.0956392		0.0036	0.0154033		0.0524	0.12103
galactinol		6429.5	1213-79020		7121	1917-56144		3244.5	474-59476		0.7494	0.861645		0.7682	0.978649		galactinol		5928	926-28689		0.9405	0.944117		0.6544	0.73304		0.3321	0.461054
fumaric acid		11907	6491-40412		11477.5	3588-36679		15210	6148-27875		0.9491	0.9491		0.7682	0.786969		fumaric acid		9757	4488-16698		0.2963	0.370021		0.2963	0.402783		0.0252	0.0764791
fucose		194591	94440-861282		136068	7351-792508		224708	54248-620751		0.5653	0.752772		0.7682	0.692433		fucose		113775	33717-353320		0.1357	0.198976		0.5019	0.61213		0.2326	0.363525
fructose		11335	617-51325		9383	671-70791		10162	1969-32930		0.7494	0.861645		0.964	0.786969		fructose		7871	4450-25033		0.7654	0.812071		0.6015	0.688559		0.3321	0.461054
ferulic acid		779.5	204-2318		2025	502-5808		592	111-2512		0.1797	0.450978		0.0515	0.119792		ferulic acid		3622	644-11496		0.0028	0.0114188		0.044	0.0863459		0.0017	0.0153
ethanolamine		39330	18443-167497		68201.5	36464-265633		46563	9073-62085		0.6547	0.821523		0.1916	0.357977		ethanolamine		52573.5	28095-143418		0.7091	0.771146		0.4556	0.568955		0.2631	0.396931
erythritol		1231.5	345-16558		14216.5	6136-24623		9931	2484-21900		0.0476	0.335773		0.1118	0.185468		erythritol		3005.5	864-33822		0.2631	0.336613		0.0734	0.128573		0.1793	0.303879
enolpyruvate		661.5	396-2224		1543.5	745-2980		1671	744-3718		0.1417	0.430043		0.3046	0.357977		enolpyruvate		2265	1097-4981		0.0017	0.00944043		0.0207	0.050025		0.0622	0.135285
docosahexaenoic acid		4030.5	2370-9321		3791	2742-17931		10217.5	1618-22120		0.3379	0.616727		0.1118	0.54549		docosahexaenoic acid		11162	2451-47821		0.017	0.0385826		0.1357	0.21336		0.8229	0.859108
dithiothreitol		1286.5a	698-2612		2327b	1592-3166		2785b	1769-4122		0.0476	0.335773		0.0012	0.0261		dithiothreitol		4704	2125-15467		0.0006	0.00711818		0.0022	0.0112588		0.0138	0.0537582
digalacturonic acid		376	88-5308		862.5	363-3623		1073	259-11628		0.3379	0.616727		0.964	0.786969		digalacturonic acid		589	157-10742		0.3321	0.408859		0.5506	0.650256		0.5506	0.674679
D-erythro-sphingosine		20544	5536-101652		13165	4118-46140		25503.5	5474-62480		0.848	0.892452		0.9999	0.978649		D-erythro-sphingosine		58474	6103-301682		0.1007	0.16026		0.0252	0.0592541		0.0734	0.153259
deoxycholic acid		6902	1325-1380784		8313	1668-154398		10519.5	2827-583169		0.4822	0.719167		0.3046	0.692433		deoxycholic acid		1241281	8499-3286200		0.0252	0.05481		0.0008	0.0072		0.0028	0.0192316
daidzein		831.5	55-3854		574.5	73-20706		1757	260-18454		0.4062	0.671001		0.0854	0.322079		daidzein		1960	142-36954		0.1793	0.246302		0.2963	0.402783		0.6015	0.716856
cytosin		741a	302-2930		1225.5a,b	652-3589		1615.5b	541-2550		0.1102	0.394003		0.0272	0.119792		cytosin		2006	767-5894		0.0072	0.0213545		0.009	0.0305065		0.1563	0.277512
cystine		2246	766-46749		3960	1026-22417		1625	943-3293		0.5224	0.752772		0.928	0.958462		cystine		2063	249-4098		0.1357	0.198976		0.1357	0.21336		0.8814	0.905691
cysteine		14119.5	4810-27476		13216.5	5671-35212		13242	3557-29126		0.6547	0.821523		0.964	0.786969		cysteine		5248	653-19949		0.0112	0.0286588		0.0138	0.04002		0.0524	0.12103
cyanoalanine		4621.5	319-13312		1126	242-33394		1335.5	721-10134		0.0253	0.253973		0.0854	0.480072		cyanoalanine		1378.5	91-3469		0.0058	0.0189225		0.7654	0.828919		0.6544	0.742602
creatinine		19863.5	1955-44669		21552.5	4603-47656		24181	5191-36467		0.848	0.892452		0.6197	0.874735		creatinine		3011	1157-131744		0.1357	0.198976		0.0734	0.128573		0.0524	0.12103
creatine		22982	1955-45687		21200	3914-56662		25736	4404-42037		0.848	0.892452		0.964	0.978649		creatine		4138.5	1157-113125		0.1793	0.246302		0.1172	0.188822		0.1007	0.191845
conduritol-beta-epoxide		4190	220-13854		6016.5	1993-112437		4659.5	270-69985		0.2774	0.57009		0.1916	0.54549		conduritol-beta-epoxide		924.5	257-2661		0.1563	0.221708		0.0006	0.00711818		0.0734	0.153259
citrulline		48750	37008-79203		29279.5	14310-75094		40137	20834-71563		0.1102	0.394003		0.0515	0.155065		citrulline		27786.5	6637-46626		0.0017	0.00944043		0.4556	0.568955		0.0252	0.0764791
citric acid		975.5	153-5305		928	187-2045		1117	256-4015		0.6547	0.821523		0.964	0.786969		citric acid		2061.5	721-6642		0.044	0.0857015		0.0367	0.0772476		0.044	0.10834
citramalic acid		699	81-4221		531.5	251-1506		4370.5	394-7620		0.7494	0.861645		0.964	0.1044		citramalic acid		1955.5	1038-5680		0.0524	0.0956392		0.0058	0.0219391		0.2963	0.432035
cis-sinapinic acid		40.5a	5-126		140.5b	53-821		82.5b	46-317		0.006	0.1566		0.0012	0.0335571		cis-sinapinic acid		168	29-821		0.0022	0.0097322		0.5757	0.676836		0.057	0.1305
cis-gondoic acid		212.5a	118-922		485a,b	185-641		412b	197-2792		0.0476	0.335773		0.0162	0.322079		cis-gondoic acid		1226	416-2637		0.001	0.00815625		0.0013	0.00917027		0.0252	0.0764791
cis-caffeic acid		146	73-762		208	86-1414		354	96-2484		0.6089	0.806715		0.964	0.786969		cis-caffeic acid		998	168-7392		0.0022	0.0097322		0.0046	0.0184708		0.0305	0.0855968
cholesterone		165.5	58-2228		171	47-652		431.5	122-1229		0.1797	0.450978		0.1916	0.54549		cholesterone		331	24-1069		0.0622	0.109691		0.5506	0.650256		0.2631	0.396931
cholesterol		104905	53105-262572		85772.5	54209-359717		154013	71938-254875		0.9491	0.9491		0.7682	0.786969		cholesterol		180178	65320-402158		0.0862	0.143301		0.1563	0.239966		0.6544	0.742602
chlorogenic acid		454	33-3492		552.5	153-23036		524.5	124-28262		0.6547	0.821523		0.4861	0.54549		chlorogenic acid		1257	129-3403		0.2631	0.336613		0.3706	0.483633		0.1793	0.303879
chenodeoxycholic acid		4219	1405-72177		22923	4063-66027		11024.5	2002-18265		0.0476	0.335773		0.4861	0.786969		chenodeoxycholic acid		8775	1182-25294		0.1563	0.221708		0.0112	0.0336		0.5506	0.674679
caprylic acid		2620.5	1739-7391		4430.5	2791-7296		5678.5	4409-9730		0.1102	0.394003		0.0515	0.119792		caprylic acid		17922.5	4077-45125		0.0005	0.00711818		0.0008	0.0072		0.0072	0.038351
capric acid		1116a	669-3161		1558.5a,b	1054-2405		2269b	1485-3537		0.4062	0.671001		0.0084	0.0522		capric acid		6417	1646-123473		0.001	0.00815625		0.0008	0.0072		0.0138	0.0537582
butyrolactam		5397.5a	2075-12265		17666b	6960-93041		8349.5a,b	5099-48338		0.0027	0.11745		0.0272	0.254233		butyrolactam		16084	6561-30940		0.0006	0.00711818		0.2326	0.333564		0.017	0.0583816
beta-glutamic acid		4660	730-33813		8031.5	65-18234		2813.5	188-7341		0.848	0.892452		0.1916	0.322079		beta-glutamic acid		1054	251-5279		0.1357	0.198976		0.3321	0.446794		0.3706	0.503784
beta-gentiobiose		3257	1475-17712		7294	2523-43652		8218	157-44138		0.2774	0.57009		0.7682	0.692433		beta-gentiobiose		3833	348-50828		0.6544	0.73304		0.1793	0.26895		0.6015	0.716856
beta-alanine		10594.5a,b	369-30336		2868.5a	868-12389		21890b	11536-40945		0.4062	0.671001		0.0272	0.119792		beta-alanine		31791	9331-304438		0.0112	0.0286588		0.0005	0.00711818		0.4556	0.5916
beta sitosterol		5780.5a	1866-37635		26304.5b	10987-56501		41572b	8595-62704		0.0639	0.347456		0.0012	0.0335571		beta sitosterol		72880.5	28720-157977		0.001	0.00815625		0.0058	0.0219391		0.044	0.10834
aspartic acid		246988.5a,c	84289-374303		63336b	18770-427239		133143.5c	44576-220265		0.0088	0.176677		0.0012	0.119792		aspartic acid		48102	19076-109432		0.0005	0.00711818		0.5019	0.61213		0.0028	0.0192316
asparagine		36034.5	13244-61871		18685	5055-123850		14546.5	3880-88755		0.4062	0.671001		0.0854	0.446159		asparagine		11314	4402-36652		0.0017	0.00944043		0.1007	0.167406		0.5019	0.626775
arachidonic acid		26593.5	5175-78540		39669.5	9242-66370		21947.5	4054-146506		0.4822	0.719167		0.7682	0.978649		arachidonic acid		32860.5	8685-66425		0.5019	0.582204		0.8814	0.920182		0.2631	0.396931
aminomalonate		8652	2929-12719		9041.5	2991-14655		4509.5	1051-19441		0.7494	0.861645		0.4861	0.480072		aminomalonate		4362	1951-12123		0.0207	0.0461769		0.0862	0.147047		0.7091	0.787554
alpha-ketoglutarate		1333.5	286-26005		1271.5	315-3629		896.5	297-2028		0.6547	0.821523		0.7682	0.692433		alpha-ketoglutarate		463	226-1133		0.1172	0.179936		0.0187	0.0483238		0.0124	0.0537582
alpha-aminoadipic acid		1522.5	263-5874		1653	315-8043		2377.5	474-22940		0.7494	0.861645		0.3046	0.357977		alpha-aminoadipic acid		2847.5	998-5940		0.0622	0.109691		0.1563	0.239966		0.6276	0.741193
allantoic acid		4049	1424-14714		7315.5	1381-12456		3631.5	1430-12291		0.7494	0.861645		0.7682	0.786969		allantoic acid		2565	743-5884		0.1007	0.16026		0.0734	0.128573		0.2326	0.363525
alanine-alanine		15555	3947-91901		36319.5	17893-80064		54435.5	20225-119163		0.4062	0.671001		0.0854	0.155065		alanine-alanine		46685	24159-222542		0.1563	0.221708		0.2631	0.367214		0.9405	0.944117
alanine		1647708	1008070-2016160		1430858	744375-2441160		1645299	822323-1738365		0.5653	0.752772		0.964	0.786969		alanine		1.00423e+06	739980-1927552		0.0058	0.0189225		0.044	0.0863459		0.1793	0.303879
adenosine		1228	350-9491		1340.5	317-2755		1012	267-7075		0.4822	0.719167		0.1118	0.54549		adenosine		6524.5	2002-44592		0.0138	0.0336617		0.0006	0.00711818		0.0003	0.01305
adenine		3388.5	1773-18998		7928	2372-52834		7625	2071-28776		0.1797	0.450978		0.1916	0.322079		adenine		19552	10301-93797		0.0028	0.0114188		0.0862	0.147047		0.0112	0.0504
acetophenone		55776a	33377-160895		127141a,b	65604-224243		188131b	83659-232416		0.035	0.3045		0.0003	0.0261		acetophenone		229934	109026-598707		0.0006	0.00711818		0.0046	0.0184708		0.1172	0.21391
7-methylguanine		1095	322-2791		1551	946-2930		2804	1004-4876		0.2248	0.501477		0.1118	0.446159		7-methylguanine		5043	1935-12551		0.0008	0.00745714		0.0013	0.00917027		0.0112	0.0504
6-hydroxynicotinic acid		1189	57-6829		291	139-6946		1207	371-35321		0.848	0.892452		0.0854	0.254233		6-hydroxynicotinic acid		6200.5	1401-55534		0.0112	0.0286588		0.0022	0.0112588		0.017	0.0583816
6-deoxyglucose		24892.5	2304-189058		21374	3760-143714		28998.5	5384-245871		0.848	0.892452		0.7682	0.978649		6-deoxyglucose		101248	22805-424868		0.017	0.0385826		0.0367	0.0772476		0.0112	0.0504
5'-deoxy-5'-methylthioadenosine		121	6-943		524.5	202-977		902	86-3090		0.0476	0.335773		0.1916	0.480072		5'-deoxy-5'-methylthioadenosine		467	57-3552		0.044	0.0857015		1	1		0.5019	0.626775
5-aminovaleric acid		815452	71100-2059705		1.3097e+06	6084-2565314		2225880	790833-4091025		0.0127	0.207169		0.0854	0.254233		5-aminovaleric acid		1337789	544521-3514982		0.0138	0.0336617		0.9405	0.955138		0.2326	0.363525
5,6-dihydrouracil		944	329-6066		1918.5	945-5699		2011.5	1008-3896		0.1417	0.430043		0.0854	0.155065		5,6-dihydrouracil		2923	1614-65884		0.0207	0.0461769		0.2326	0.333564		0.0524	0.12103
4-pyridoxic acid		300	188-1332		261.5	153-1263		218.5	125-726		0.848	0.892452		0.6197	0.874735		4-pyridoxic acid		1125	576-2732		0.0013	0.00892895		0.0028	0.0123864		0.0006	0.01305
4-hydroxyphenylacetic acid		9439.5	531-49665		9177.5	3626-112058		36878.5	5557-98529		0.4822	0.719167		0.7682	0.692433		4-hydroxyphenylacetic acid		54842.5	9118-124094		0.0036	0.0134229		0.017	0.04437		0.1357	0.245956
4-hydroxymandelic acid		669	296-1924		866	421-1513		1072.5	703-1695		0.2008	0.499131		0.1916	0.480072		4-hydroxymandelic acid		4968	840-63556		0.0008	0.00745714		0.001	0.00815625		0.0022	0.0174
4-hydroxycinnamic acid		2144	1123-5501		3691	1554-16051		2412.5	673-10714		0.1797	0.450978		0.3046	0.446159		4-hydroxycinnamic acid		3756.5	2125-6576		0.009	0.0249894		0.6015	0.688559		0.044	0.10834
4-hydroxybutyric acid		2090	932-7154		4891	3023-10090		6722	3972-13500		0.0845	0.386921		0.4861	0.446159		4-hydroxybutyric acid		10518	3462-24527		0.0022	0.0097322		0.044	0.0863459		0.3706	0.503784
4-hydroxybenzoate		4393.5	1843-28366		5046	2010-25761		6532.5	2536-13140		0.4062	0.671001		0.964	0.874735		4-hydroxybenzoate		46913	5879-291818		0.0008	0.00745714		0.0008	0.0072		0.0008	0.01305
4-aminobutyric acid		12098.5a	6260-68124		68368.5b	8091-527146		24551.5a,b	8167-267457		0.0027	0.11745		0.0003	0.112343		4-aminobutyric acid		20149.5	4592-58084		0.2047	0.271202		0.0013	0.00917027		0.5019	0.626775
4-aminobenzoicacid		167.5	21-741		142	63-706		103	57-434		0.4822	0.719167		0.4861	0.874735		4-aminobenzoicacid		527.5	199-1443		0.0072	0.0213545		0.0072	0.0264676		0.0013	0.01305
3-phenyllactic acid		3422	518-6108		16831.5	5081-48256		15474.5	3567-26016		0.004	0.1305		0.0854	0.16589		3-phenyllactic acid		6564	1523-77195		0.044	0.0857015		0.1007	0.167406		0.1793	0.303879
3-hydroxypropionic acid		5686.5	1440-20001		9888	5220-17378		16479	3666-20393		0.1797	0.450978		0.4861	0.54549		3-hydroxypropionic acid		22617.5	8849-126599		0.0072	0.0213545		0.0112	0.0336		0.0622	0.135285
3-hydroxypalmitic acid		379.5	121-5434		372	190-615		266.5	70-2681		0.848	0.892452		0.7682	0.692433		3-hydroxypalmitic acid		5612.5	1761-17495		0.0017	0.00944043		0.0003	0.00711818		0.0003	0.01305
3-hydroxybutyric acid		3266a	2449-12398		8334.5b	3098-41148		13501b	3567-56971		0.0253	0.253973		0.0027	0.0335571		3-hydroxybutyric acid		32072.5	4666-445837		0.0006	0.00711818		0.0524	0.100562		0.0862	0.177151
3-hydroxybenzoic acid		220	137-651		456.5	136-595		580.5	280-1107		0.2248	0.501477		0.1118	0.185468		3-hydroxybenzoic acid		1766.5	383-7227		0.0005	0.00711818		0.0008	0.0072		0.0028	0.0192316
3-hydroxy-3-methylglutaric acid		443	40-3845		213.5	51-2215		394	196-1489		0.7494	0.861645		0.4861	0.54549		3-hydroxy-3-methylglutaric acid		918	146-12739		0.1172	0.179936		0.0524	0.100562		0.1793	0.303879
3-aminoisobutyric acid		5565.5	1730-35042		2815	915-24750		5057	1820-16163		0.1102	0.394003		0.4861	0.874735		3-aminoisobutyric acid		9847.5	2536-47044		0.8229	0.859108		0.0734	0.128573		0.2047	0.329794
3,6-anhydro-D-glucose		3982	1516-12659		4567.5	1220-7182		4761.5	808-42677		0.848	0.892452		0.964	0.786969		3,6-anhydro-D-glucose		3793.5	2404-35813		0.4556	0.540507		0.4556	0.568955		0.5019	0.626775
3,6-anhydro-D-galactose		3295.5	1980-12283		3787	3067-15812		7110	1048-43176		0.3379	0.616727		0.6197	0.874735		3,6-anhydro-D-galactose		5043.5	2843-35849		0.1357	0.198976		0.4556	0.568955		0.4118	0.548366
3,4-dihydroxyphenylacetic acid		351	140-6351		1179	212-13981		985	231-2767		0.2248	0.501477		0.1916	0.254233		3,4-dihydroxyphenylacetic acid		1147	171-3486		0.1793	0.246302		0.9405	0.955138		0.4556	0.5916
3,4-dihydroxyhydrocinnamic acid		117122	11889-153578		23182.5	1875-139097		92481.5	20034-152614		0.1417	0.430043		0.3046	0.446159		3,4-dihydroxyhydrocinnamic acid		81775	5104-325790		0.8814	0.902139		0.1357	0.21336		0.5506	0.674679
3,4-dihydroxycinnamic acid		835	449-4578		3023.5	1049-8176		2917	780-11675		0.1102	0.394003		0.1118	0.254233		3,4-dihydroxycinnamic acid		2934	1000-4454		0.0862	0.143301		0.7091	0.787554		0.6544	0.742602
3,4-dihydroxybenzoic acid		2783.5	844-23907		5863.5	2549-53841		5885.5	3924-35410		0.1417	0.430043		0.0515	0.119792		3,4-dihydroxybenzoic acid		20296	2792-65396		0.0072	0.0213545		0.0862	0.147047		0.1007	0.191845
3-(4-hydroxyphenyl)propionic acid		4603	321-110407		4582	762-86371		10571.5	1646-46294		0.9491	0.9491		0.4861	0.446159		3-(4-hydroxyphenyl)propionic acid		110350	34875-409602		0.0017	0.00944043		0.0013	0.00917027		0.0006	0.01305
3-(3-hydroxyphenyl)propionic acid		2190	506-9287		2496.5	1044-6846		2459	1018-9777		0.9491	0.9491		0.7682	0.786969		3-(3-hydroxyphenyl)propionic acid		192698	5704-1177918		0.0005	0.00711818		0.0003	0.00711818		0.0008	0.01305
2-picolinic acid		2230.5	1245-4551		2944	1086-5635		4468	1777-5578		0.4822	0.719167		0.2366	0.322079		2-picolinic acid		4794.5	712-11238		0.0112	0.0286588		0.044	0.0863459		0.2047	0.329794
2-monoolein		4923.5	256-54356		7421.5	3906-41139		8158.5	4650-35087		0.9491	0.9491		0.2366	0.446159		2-monoolein		50453.5	10702-138607		0.017	0.0385826		0.0017	0.0100841		0.0028	0.0192316
2-ketoisocaproic acid		12428.5	4003-62448		4924.5	1109-10392		7620	3830-17341		0.0845	0.386921		0.0854	0.254233		2-ketoisocaproic acid		8208	3791-21929		0.5019	0.582204		0.017	0.04437		0.6015	0.716856
2-hydroxyglutaric acid		3172	1587-9828		8412.5	973-13918		6659.5	1299-47713		0.0253	0.253973		0.2366	0.692433		2-hydroxyglutaric acid		2535.5	1254-9690		0.6544	0.73304		0.0252	0.0592541		0.0524	0.12103
2-hydroxybutanoic acid		19076.5a	9910-142733		168286b	5724-367898		91445a,b	9211-155742		0.0088	0.176677		0.0036	0.119792		2-hydroxybutanoic acid		19826.5	8384-93585		0.7091	0.771146		0.001	0.00815625		0.0367	0.0967545
2-deoxytetronic acid		1280	329-8698		1964.5	836-4957		3544	684-14820		0.4822	0.719167		0.4861	0.480072		2-deoxytetronic acid		10462	2280-36640		0.0022	0.0097322		0.0017	0.0100841		0.0013	0.01305
2-deoxypentitol		862	69-4289		848.5	168-2475		1045	448-3135		0.9491	0.9491		0.3046	0.357977		2-deoxypentitol		2440.5	313-12817		0.0305	0.063684		0.0112	0.0336		0.0305	0.0855968
2'-deoxyguanosine		1177	658-5745		1367	469-2966		2210.5	831-4704		0.6547	0.821523		0.3046	0.446159		2'-deoxyguanosine		3674	1210-17091		0.0367	0.0742535		0.0022	0.0112588		0.1007	0.191845
2-aminophenol		203.5	60-744		263	107-2175		325.5	140-1168		0.5653	0.752772		0.9999	0.978649		2-aminophenol		1088	436-7573		0.0022	0.0097322		0.009	0.0305065		0.0046	0.0272864
2-aminobutyric acid		179124	27465-359539		91827.5	5018-438097		88843	20255-672038		0.9491	0.9491		0.964	0.978649		2-aminobutyric acid		203520	92682-470996		0.1793	0.246302		0.044	0.0863459		0.0252	0.0764791
2,6-diaminopimelic acid		579	366-3928		567.5	308-4219		991.5	243-5127		0.848	0.892452		0.6197	0.54549		2,6-diaminopimelic acid		1652	775-2669		0.017	0.0385826		0.0112	0.0336		0.0305	0.0855968
2,5-dihydroxypyrazine		2011.5a	907-4617		3739b	1668-6432		4253b	1707-8964		0.1102	0.394003		0.0207	0.1044		2,5-dihydroxypyrazine		7305.5	3021-13460		0.0008	0.00745714		0.0028	0.0123864		0.0028	0.0192316
2,4-hexadienedioic acid		394.5	168-788		588.5	142-1095		547.5	67-1834		0.4062	0.671001		0.7682	0.692433		2,4-hexadienedioic acid		1168	200-4976		0.0058	0.0189225		0.017	0.04437		0.0305	0.0855968
1-monostearin		3111	1639-18784		3942.5	1074-9099		4921	2104-13054		0.5653	0.752772		0.3046	0.446159		1-monostearin		9705.5	662-76464		0.1007	0.16026		0.017	0.04437		0.017	0.0583816
1-monopalmitin		2070.5	933-25963		4739.5	3311-14485		4242.5	559-9690		0.0639	0.347456		0.1118	0.254233		1-monopalmitin		19566	7057-95958		0.0028	0.0114188		0.0028	0.0123864		0.0006	0.01305
1-monoolein		4776	2160-331910		11045	4826-117481		19390	4058-50363		0.2774	0.57009		0.6197	0.874735		1-monoolein		154722	10885-987231		0.0036	0.0134229		0.0017	0.0100841		0.001	0.01305
1-methylhydantoin		6569.5	2405-16044		9997	7218-18490		11547.5	7108-19730		0.3379	0.616727		0.1118	0.185468		1-methylhydantoin		23168.5	7030-59251		0.0028	0.0114188		0.0138	0.04002		0.044	0.10834
1-hexadecanol		419	154-781		559.5	350-1027		697	308-2500		0.1797	0.450978		0.1916	0.357977		1-hexadecanol		975.5	493-1423		0.0022	0.0097322		0.017	0.04437		0.4118	0.548366
